# Supplementary material for: Genetic Variation among Pharmacogenes in the Sardinian Population
Source: Preprints.org preprint supplement (doi:10.20944/preprints202207.0430.v1), 2022-07-28
Supplement: Supplementary file 1 [file Suppl. Tables.xlsx]

## Sheet: ST1
Gene phenotypes leading to non-typical drug response as determined by CPIC
According to suppl table 1 https://ascpt.onlinelibrary.wiley.com/doi/10.1002/cpt.2122
Gene	Non-typical response phenotypes
CFTR	Ivacaftor non-responsive
CYP2B6	Intermediate Metabolizer, Poor Metabolizer
CYP2C19	Intermediate Metabolizer, Poor Metabolizer, Rapid Metabolizer, Ultrarapid Metabolizer
CYP2C9	Intermediate Metabolizer, Poor Metabolizer
CYP2D6	Intermediate Metabolizer, Poor Metabolizer, Ultrarapid Metabolizer*
CYP3A5	Normal Metabolizer, Intermediate Metabolizer
CYP4F2	Increased dose phenotype
DPYD	Intermediate Metabolizer, Poor Metabolizer
IFNL3	Unfavorable response genotype
NUDT15	Intermediate Metabolizer, Poor Metabolizer, Possible Intermediate Metabolizer
SLCO1B1	Poor Function, Decreased Function, Possible Decreased Function
TPMT	Intermediate Function, Poor Function
UGT1A1	Poor Metabolizer
VKORC1	Decreased warfarin dose, possibly decreased warfarin dose

## Sheet: ST2 
53 drugs that have CPIC recommendations based on any of the 14 genes included in this study
Gene	Drug	Drug RxNorm ID	Drug ATC IDs	Guideline	CPIC Level	CPIC Level Status
CYP2C19	amitriptyline	704	N06AA09, N06CA01	https://cpicpgx.org/guidelines/guideline-for-tricyclic-antidepressants-and-cyp2d6-and-cyp2c19/	A	Final
CYP2D6	amitriptyline	704	N06AA09, N06CA01	https://cpicpgx.org/guidelines/guideline-for-tricyclic-antidepressants-and-cyp2d6-and-cyp2c19/	A	Final
UGT1A1	atazanavir	343047	J05AE08, J05AR15	https://cpicpgx.org/guidelines/guideline-for-atazanavir-and-ugt1a1/	A	Final
CYP2D6	atomoxetine	38400	N06BA09	https://cpicpgx.org/guidelines/cpic-guideline-for-atomoxetine-based-on-cyp2d6-genotype/	A	Final
SLCO1B1	atorvastatin	83367	C10AA05	https://cpicpgx.org/guidelines/cpic-guideline-for-statins/	A	Final
NUDT15	azathioprine	1256	L04AX01	https://cpicpgx.org/guidelines/guideline-for-thiopurines-and-tpmt/	A	Final
TPMT	azathioprine	1256	L04AX01	https://cpicpgx.org/guidelines/guideline-for-thiopurines-and-tpmt/	A	Final
DPYD	capecitabine	194000	L01BC06	https://cpicpgx.org/guidelines/guideline-for-fluoropyrimidines-and-dpyd/	A	Final
CYP2C9	celecoxib	140587	L01XX33, M01AH01	https://cpicpgx.org/guidelines/cpic-guideline-for-nsaids-based-on-cyp2c9-genotype/	A	Final
CYP2C19	citalopram	2556	N06AB04	https://cpicpgx.org/guidelines/guideline-for-selective-serotonin-reuptake-inhibitors-and-cyp2d6-and-cyp2c19/	A	Final
CYP2C19	clopidogrel	32968	B01AC04	https://cpicpgx.org/guidelines/guideline-for-clopidogrel-and-cyp2c19/	A	Final
CYP2D6	codeine	2670	R05DA04, N02AA59, N02AA79	https://cpicpgx.org/guidelines/guideline-for-codeine-and-cyp2d6/	A	Final
CYP2B6	efavirenz	195085	J05AG03	https://cpicpgx.org/guidelines/cpic-guideline-for-efavirenz-based-on-cyp2b6-genotype/	A	Final
CYP2C19	escitalopram	321988	N06AB10	https://cpicpgx.org/guidelines/guideline-for-selective-serotonin-reuptake-inhibitors-and-cyp2d6-and-cyp2c19/	A	Final
DPYD	fluorouracil	4492	L01BC02, L01BC52	https://cpicpgx.org/guidelines/guideline-for-fluoropyrimidines-and-dpyd/	A	Final
CYP2C9	flurbiprofen	4502	M01AE09, M02AA19, R02AX01, S01BC04	https://cpicpgx.org/guidelines/cpic-guideline-for-nsaids-based-on-cyp2c9-genotype/	A	Final
CYP2C9	fluvastatin	41127	C10AA04	https://cpicpgx.org/guidelines/cpic-guideline-for-statins/	A	Final
SLCO1B1	fluvastatin	41127	C10AA04	https://cpicpgx.org/guidelines/cpic-guideline-for-statins/	A	Final
CYP2C9	fosphenytoin	72236	N03AB05	https://cpicpgx.org/guidelines/guideline-for-phenytoin-and-cyp2c9-and-hla-b/	A	Final
CYP2C9	ibuprofen	5640	C01EB16, G02CC01, M01AE01, M02AA13	https://cpicpgx.org/guidelines/cpic-guideline-for-nsaids-based-on-cyp2c9-genotype/	A	Final
CFTR	ivacaftor	1243041	R07AX02, R07AX30	https://cpicpgx.org/guidelines/guideline-for-ivacaftor-and-cftr/	A	Final
CYP2C19	lansoprazole	17128	A02BC03	https://cpicpgx.org/guidelines/cpic-guideline-for-proton-pump-inhibitors-and-cyp2c19/	A	Final
CYP2C9	lornoxicam	20890	M01AC05	https://cpicpgx.org/guidelines/cpic-guideline-for-nsaids-based-on-cyp2c9-genotype/	A	Final
SLCO1B1	lovastatin	6472	C10AA02	https://cpicpgx.org/guidelines/cpic-guideline-for-statins/	A	Final
CYP2C9	meloxicam	41493	M01AC06	https://cpicpgx.org/guidelines/cpic-guideline-for-nsaids-based-on-cyp2c9-genotype/	A	Final
NUDT15	mercaptopurine	103	L01BB02	https://cpicpgx.org/guidelines/guideline-for-thiopurines-and-tpmt/	A	Final
TPMT	mercaptopurine	103	L01BB02	https://cpicpgx.org/guidelines/guideline-for-thiopurines-and-tpmt/	A	Final
CYP2D6	nortriptyline	7531	N06AA10	https://cpicpgx.org/guidelines/guideline-for-tricyclic-antidepressants-and-cyp2d6-and-cyp2c19/	A	Final
CYP2C19	omeprazole	7646	A02BC01	https://cpicpgx.org/guidelines/cpic-guideline-for-proton-pump-inhibitors-and-cyp2c19/	A	Final
CYP2D6	ondansetron	26225	A04AA01	https://cpicpgx.org/guidelines/guideline-for-ondansetron-and-tropisetron-and-cyp2d6-genotype/	A	Final
CYP2C19	pantoprazole	40790	A02BC02	https://cpicpgx.org/guidelines/cpic-guideline-for-proton-pump-inhibitors-and-cyp2c19/	A	Final
CYP2D6	paroxetine	32937	N06AB05	https://cpicpgx.org/guidelines/guideline-for-selective-serotonin-reuptake-inhibitors-and-cyp2d6-and-cyp2c19/	A	Final
IFNL3	peginterferon alfa-2a	120608	L03AB11, L03AB61	https://cpicpgx.org/guidelines/guideline-for-peg-interferon-alpha-based-regimens-and-ifnl3/	A	Final
IFNL3	peginterferon alfa-2b	253453	L03AB10, L03AB60	https://cpicpgx.org/guidelines/guideline-for-peg-interferon-alpha-based-regimens-and-ifnl3/	A	Final
CYP2C9	phenytoin	8183	N03AB02, N03AB52	https://cpicpgx.org/guidelines/guideline-for-phenytoin-and-cyp2c9-and-hla-b/	A	Final
CYP2C9	piroxicam	8356	M01AC01	https://cpicpgx.org/guidelines/cpic-guideline-for-nsaids-based-on-cyp2c9-genotype/	A	Final
SLCO1B1	pitavastatin	861634	C10AA08	https://cpicpgx.org/guidelines/cpic-guideline-for-statins/	A	Final
SLCO1B1	pravastatin	42463	C10AA03	https://cpicpgx.org/guidelines/cpic-guideline-for-statins/	A	Final
SLCO1B1	rosuvastatin	301542	C10AA07	https://cpicpgx.org/guidelines/cpic-guideline-for-statins/	A	Final
SLCO1B1	simvastatin	36567	C10AA01, C10BA02, C10BX04, A10BH51, C10BA04, C10BX01	https://cpicpgx.org/guidelines/cpic-guideline-for-statins/	A	Final
CYP3A5	tacrolimus	42316	D11AH01, L04AD02	https://cpicpgx.org/guidelines/guideline-for-tacrolimus-and-cyp3a5/	A	Final
CYP2D6	tamoxifen	10324	L02BA01	https://cpicpgx.org/guidelines/cpic-guideline-for-tamoxifen-based-on-cyp2d6-genotype/	A	Final
CYP2C9	tenoxicam	37790	M01AC02	https://cpicpgx.org/guidelines/cpic-guideline-for-nsaids-based-on-cyp2c9-genotype/	A	Final
NUDT15	thioguanine	10485	L01BB03	https://cpicpgx.org/guidelines/guideline-for-thiopurines-and-tpmt/	A	Final
TPMT	thioguanine	10485	L01BB03	https://cpicpgx.org/guidelines/guideline-for-thiopurines-and-tpmt/	A	Final
CYP2D6	tramadol	10689	N02AX02	https://cpicpgx.org/guidelines/guideline-for-codeine-and-cyp2d6/	A	Final
CYP2D6	tropisetron	27392	A04AA03	https://cpicpgx.org/guidelines/guideline-for-ondansetron-and-tropisetron-and-cyp2d6-genotype/	A	Final
CYP2C19	voriconazole	121243	J02AC03	https://cpicpgx.org/guidelines/guideline-for-voriconazole-and-cyp2c19/	A	Final
CYP2C9	warfarin	11289	B01AA03	https://cpicpgx.org/guidelines/guideline-for-warfarin-and-cyp2c9-and-vkorc1/	A	Final
CYP4F2	warfarin	11289	B01AA03	https://cpicpgx.org/guidelines/guideline-for-warfarin-and-cyp2c9-and-vkorc1/	A	Final
VKORC1	warfarin	11289	B01AA03	https://cpicpgx.org/guidelines/guideline-for-warfarin-and-cyp2c9-and-vkorc1/	A	Final
CYP2C19	clomipramine	2597	N06AA04	https://cpicpgx.org/guidelines/guideline-for-tricyclic-antidepressants-and-cyp2d6-and-cyp2c19/	B	Final
CYP2D6	clomipramine	2597	N06AA04	https://cpicpgx.org/guidelines/guideline-for-tricyclic-antidepressants-and-cyp2d6-and-cyp2c19/	B	Final
CYP2D6	desipramine	3247	N06AA01	https://cpicpgx.org/guidelines/guideline-for-tricyclic-antidepressants-and-cyp2d6-and-cyp2c19/	B	Final
CYP2C19	dexlansoprazole	816346	A02BC06	https://cpicpgx.org/guidelines/cpic-guideline-for-proton-pump-inhibitors-and-cyp2c19/	B	Final
CYP2C19	doxepin	3638	N06AA12	https://cpicpgx.org/guidelines/guideline-for-tricyclic-antidepressants-and-cyp2d6-and-cyp2c19/	B	Final
CYP2D6	doxepin	3638	N06AA12	https://cpicpgx.org/guidelines/guideline-for-tricyclic-antidepressants-and-cyp2d6-and-cyp2c19/	B	Final
CYP2D6	fluvoxamine	42355	N06AB08	https://cpicpgx.org/guidelines/guideline-for-selective-serotonin-reuptake-inhibitors-and-cyp2d6-and-cyp2c19/	B	Final
CYP2D6	hydrocodone	5489	R05DA03	https://cpicpgx.org/guidelines/guideline-for-codeine-and-cyp2d6/	B	Final
CYP2C19	imipramine	5691	N06AA02	https://cpicpgx.org/guidelines/guideline-for-tricyclic-antidepressants-and-cyp2d6-and-cyp2c19/	B	Final
CYP2D6	imipramine	5691	N06AA02	https://cpicpgx.org/guidelines/guideline-for-tricyclic-antidepressants-and-cyp2d6-and-cyp2c19/	B	Final
CYP2C19	sertraline	36437	N06AB06	https://cpicpgx.org/guidelines/guideline-for-selective-serotonin-reuptake-inhibitors-and-cyp2d6-and-cyp2c19/	B	Final
CYP2C19	trimipramine	10834	N06AA06	https://cpicpgx.org/guidelines/guideline-for-tricyclic-antidepressants-and-cyp2d6-and-cyp2c19/	B	Final
CYP2D6	trimipramine	10834	N06AA06	https://cpicpgx.org/guidelines/guideline-for-tricyclic-antidepressants-and-cyp2d6-and-cyp2c19/	B	Final

## Sheet: ST3
Gene	Haplotype	sard_count	african_haplotype_count	east_asian_haplotype_count	european_haplotype_count	south_asian_haplotype_count	other_haplotype_count	sard_freq	abs_delta_eur	african_haplotype_frequency	east_asian_haplotype_frequency	european_haplotype_frequency	other_haplotype_frequency	south_asian_haplotype_frequency
CYP2D6	*1	1944	617	82	33476	674	1832	0.61636	0.247047	0.317387	0.241176	0.369313	0.367871	0.40311
CYP4F2	*2	13	101	25	14703	219	740	0.00412175	0.158084	0.0519547	0.0735294	0.162206	0.148594	0.130981
VKORC1	-1639A	1606	135	301	33793	308	1877	0.509195	0.136385	0.0694444	0.885294	0.37281	0.376908	0.184211
VKORC1	-1639G	1548	1809	39	56851	1364	3103	0.490805	0.136385	0.930556	0.114706	0.62719	0.623092	0.815789
SLCO1B1	*1A	1598	388	78	57322	945	2552	0.506658	0.125728	0.199588	0.229412	0.632386	0.51245	0.565191
CYP4F2	*2+*3	903	101	25	14703	219	740	0.286303	0.124097	0.0519547	0.0735294	0.162206	0.148594	0.130981
CYP4F2	*1	1833	1400	258	63330	1074	3347	0.581167	0.117501	0.720165	0.758824	0.698667	0.672088	0.642344
CYP2D6	*119	321	0	0	6	1	0	0.101776	0.101709	0	0	6.6193e-05	0	0.000598
SLCO1B1	*14	436	29	0	3318	11	150	0.138237	0.101632	0.0149177	0	0.0366047	0.0301205	0.00657895
CYP2C9	*2	588	20	0	11700	90	486	0.18643	0.0573535	0.0102881	0	0.129076	0.0975904	0.0538278
CYP2C19	*17	497	430	1	19442	269	905	0.157578	0.0569098	0.221193	0.00294118	0.214487	0.181727	0.160885
CYP2B6	*5	291	5	0	3335	41	127	0.0922638	0.0554715	0.00257202	0	0.0367923	0.025502	0.0245215
CYP2C19	*1	2143	1004	232	57020	857	3056	0.679455	0.0504003	0.516461	0.682353	0.629054	0.613655	0.51256
UGT1A1	*1	1878	256	173	49918	663	2201	0.595434	0.0447305	0.131687	0.508824	0.550704	0.441968	0.396531
CYP3A5	*1	336	991	101	6197	419	782	0.106531	0.038165	0.509774	0.297059	0.0683664	0.157028	0.250598
CYP2C9	*1	2406	1499	324	72548	1362	4021	0.762841	0.037521	0.771091	0.952941	0.800362	0.80743	0.814593
CYP3A5	*3	2804	435	238	83808	1253	4062	0.88903	0.0355543	0.223765	0.7	0.924584	0.815663	0.749402
CYP2B6	*1	1978	924	247	59997	910	3045	0.62714	0.034757	0.475309	0.726471	0.661897	0.611446	0.544258
SLCO1B1	*1B	235	1055	197	9767	506	1124	0.0745086	0.0332426	0.542695	0.579412	0.107751	0.225703	0.302632
DPYD	c.2846A>T	110	2	0	655	0	24	0.0348763	0.0276503	0.00102881	0	0.00722607	0.00481928	0
CYP2B6	*9	733	688	72	18912	577	1233	0.232403	0.0237629	0.353909	0.211765	0.20864	0.24759	0.345096
SLCO1B1	*15	371	28	6	8652	50	358	0.117628	0.0221781	0.0144033	0.0176471	0.0954503	0.0718876	0.0299043
DPYD	c.1129-5923C>G&c.1236G>A (HapB3)	7	4	0	2017	36	69	0.0022194	0.0200325	0.00205761	0	0.0222519	0.0138554	0.0215311
TPMT	*1	3047	1754	334	85808	1647	4781	0.966075	0.0194264	0.902263	0.982353	0.946648	0.96004	0.985048
IFNL3	rs12979860C	2141	723	317	63281	1296	3344	0.678821	0.0193062	0.371914	0.932353	0.698127	0.671486	0.77512
IFNL3	rs12979860T	1013	1221	23	27363	376	1636	0.321179	0.0193062	0.628086	0.0676471	0.301873	0.328514	0.22488
CYP2B6	*2	67	62	15	3541	44	262	0.0212429	0.017822	0.031893	0.0441176	0.0390649	0.0526104	0.0263158
CYP2C9	*3	154	13	14	5794	183	345	0.0488269	0.0150935	0.00668724	0.0411765	0.0639204	0.0692771	0.10945
CFTR	Reference	3132	1916	336	88678	1657	4920	0.993025	0.014714	0.985597	0.988235	0.978311	0.987952	0.991029
SLCO1B1	*21	41						0.0129994	0.0129994
CFTR	F508del(TCT)	14	2	0	1502	5	26	0.00443881	0.0121315	0.00102881	0	0.0165703	0.00522088	0.00299043
CYP2D6	*33	2	4	0	1112	1	35	0.000634115	0.0116337	0.00205761	0	0.0122678	0.00702811	0.000598086
SLCO1B1	*17	70	1	37	989	9	124	0.022194	0.0112832	0.000514403	0.108824	0.0109108	0.0248996	0.00538278
CYP2C19	*2	484	327	87	12900	521	861	0.153456	0.0111409	0.16821	0.255882	0.142315	0.172892	0.311603
CYP4F2	*3	405	58	56	12466	370	765	0.128408	0.00911866	0.0298354	0.164706	0.137527	0.153614	0.221292
CYP2B6	*15	9	1	0	1034	1	18	0.00285352	0.00855374	0.000514403	0	0.0114073	0.00361446	0.000598086
CYP2B6	*22	25	0	0	0	0	0	0.00792644	0.00792644	0	0	0	0	0
TPMT	*3A	98	3	0	3422	7	81	0.0310717	0.00668043	0.00154321	0	0.0377521	0.0162651	0.0041866
CYP2C19	*35	3	74	2	650	21	61	0.000951173	0.00621974	0.0380658	0.00588235	0.00717091	0.012249	0.0125598
UGT1A1	*60+*80	893	766	23	26199	626	1608	0.283133	0.00589929	0.394033	0.0676471	0.289032	0.322892	0.374402
SLCO1B1	*35	68	111	0	2486	6	138	0.0215599	0.00586605	0.0570988	0	0.027426	0.0277108	0.00358852
NUDT15	*1	3152	1939	300	90081	1568	4866	0.999366	0.005577	0.997428	0.882353	0.993789	0.977108	0.937799
CYP2B6	*10	36	2	0	543	3	37	0.0114141	0.00542361	0.00102881	0	0.00599047	0.00742972	0.00179426
CYP2B6	*8+*9	1	1	0	493	2	6	0.000317058	0.0051218	0.000514403	0	0.00543886	0.00120482	0.00119617
CYP3A5	*6+chr7.g.99270539C>T	14						0.00443881	0.00443881
DPYD	c.1905&1G>A	1	3	0	424	7	20	0.000317058	0.00436058	0.00154321	0	0.00467764	0.00401606	0.0041866
SLCO1B1	*5	124	6	1	3257	16	155	0.0393152	0.00338338	0.00308642	0.00294118	0.0359318	0.0311245	0.00956938
CYP2C19	*4	16	1	0	191	0	24	0.00507292	0.00296578	0.000514403	0	0.00210714	0.00481928	0
UGT1A1	*60	383	692	80	10746	275	842	0.121433	0.0028814	0.355967	0.235294	0.118552	0.169076	0.164474
CYP2C9	*11	1	50	0	224	4	13	0.000317058	0.00215415	0.0257202	0	0.00247121	0.00261044	0.00239234
CFTR	F1052V	7	1	0	22	0	5	0.0022194	0.0019767	0.000514403	0	0.000242708	0.00100402	0
CYP2B6	*11	6	1	0	342	8	10	0.00190235	0.00187066	0.000514403	0	0.003773	0.00200803	0.00478469
CYP2C9	*12	2	1	0	221	0	5	0.000634115	0.001804	0.000514403	0	0.00243811	0.00100402	0
DPYD	Reference	3036	1896	340	87406	1616	4850	0.962587	0.00169064	0.975309	1	0.964278	0.973896	0.966507
NUDT15	*3	2	2	32	189	99	99	0.000634115	0.00145097	0.00102881	0.0941176	0.00208508	0.0198795	0.0592105
CYP2B6	*22+*3	4	0	0	0	0	0	0.00126823	0.00126823	0	0	0	0	0
SLCO1B1	*1B+*26	4	0	0	7	0	1	0.00126823	0.00119101	0	0	7.72252e-05	0.000200803	0
CYP2D6	*116	4	0	0	16	0	3	0.00126823	0.00109172	0	0	0.000176515	0.00060241	0
CYP2C9	*2+*6	2	0	0	0	0	0	0.000634115	0.000634115	0	0	0	0	0
TPMT	*2	7	0	0	241	0	9	0.0022194	0.000439349	0	0	0.00265875	0.00180723	0
CYP2C19	*8	11	0	0	279	0	5	0.00348764	0.00040966	0	0	0.00307798	0.00100402	0
CYP2B6	*22+*9	1	0	0	0	0	0	0.000317058	0.000317058	0	0	0	0	0
CFTR	G1069R	1	0	3	1	0	0	0.000317058	0.000306026	0	0.00882353	1.10322e-05	0	0
CYP2B6	*5+*9	1	0	0	2	0	0	0.000317058	0.000294994	0	0	2.20643e-05	0	0
CYP2D6	*53	1	0	1	2	0	1	0.000317058	0.000294994	0	0.00294118	2.20643e-05	0.000200803	0
SLCO1B1	*27	1	100	0	3	0	25	0.000317058	0.000283961	0.0514403	0	3.30965e-05	0.00502008	0
CYP2B6	*2+*5	1	4	0	4	0	0	0.000317058	0.000272929	0.00205761	0	4.41287e-05	0	0
TPMT	*16	1	0	0	4	0	2	0.000317058	0.000272929	0	0	4.41287e-05	0.000401606	0
CYP2B6	*18	1	135	0	10	0	25	0.000317058	0.000206736	0.0694444	0	0.000110322	0.00502008	0
CYP2C9	*45	1	0	0	23	0	0	0.000317058	6.33181e-05	0	0	0.00025374	0	0
CYP2D6	*1+chr22.g.42523613C>T	3						0.000951173
CYP2D6	*1+chr22.g.42525772G>A	8						0.00253646
CYP2D6	*1+chr22.g.42526694G>A	725						0.229867
CYP2D6	*1+chr22.g.42526763C>T	128						0.0405834
CYP2D6	*1+chr22.g.42526775C>T+chr22.g.42525089G>C	18						0.00570704
SLCO1B1	*14+chr12.g.21283322G>Aor*21+chr12.g.21329813C>A	2						0.000634115
SLCO1B1	*14+chr12.g.21391976A>Cor*35+chr12.g.21329813C>A	3						0.000951173
SLCO1B1	*17+chr12.g.21391976A>C	1						0.000317058
SLCO1B1	*1A+chr12.g.21283322G>A	40						0.0126823
SLCO1B1	*35+chr12.g.21283322G>Aor*21+chr12.g.21391976A>C	158						0.0500951
SLCO1B1	*35+chr12.g.21331549T>Cor*15+chr12.g.21391976A>C	2						0.000634115
TPMT	*5	1						0.000317058

## Sheet: ST4
Gene	Diplotype	sard_count	sard_freq	african_diplotype_count	east_asian_diplotype_count	european_diplotype_count	other_diplotype_count	south_asian_diplotype_count	sard_freq	abs_delta_eur	african_diplotype_frequency	east_asian_diplotype_frequency	european_diplotype_frequency	other_diplotype_frequency	south_asian_diplotype_frequency
CYP2D6	*1|*1	620	39.32	119	19	6865	360	136	0.3932	0.241728	0.122428	0.111765	0.151472	0.144578	0.162679
VKORC1	-1639A|-1639G	390	24.73	125	35	21057	1045	244	0.2473	0.217309	0.128601	0.205882	0.464609	0.419679	0.291866
IFNL3	rs12979860T|rs12979860C	331	20.99						0.2099	0.2099
IFNL3	rs12979860C|rs12979860T	368	23.34	467	23	19051	1022	276	0.2334	0.186948	0.480453	0.135294	0.420348	0.410442	0.330144
SLCO1B1	*1A|*1A	407	25.81	65	16	19757	759	291	0.2581	0.177825	0.0668724	0.0941176	0.435925	0.304819	0.348086
CYP2C19	*1|*17	166	10.53	216	0	12281	562	136	0.1053	0.165672	0.222222	0	0.270972	0.225703	0.162679
CYP2B6	*1|*9	224	14.2	344	54	13320	791	325	0.142	0.151897	0.353909	0.317647	0.293897	0.317671	0.388756
VKORC1	-1639G|-1639G	385	24.41	842	2	17897	1029	560	0.2441	0.150785	0.866255	0.0117647	0.394885	0.413253	0.669856
CYP4F2	*1|*1	534	33.86	506	100	22168	1130	349	0.3386	0.150522	0.520576	0.588235	0.489122	0.453815	0.417464
CYP4F2	*1|*3	120	7.61	73	22	10219	501	128	0.0761	0.149375	0.0751029	0.129412	0.225475	0.201205	0.15311
UGT1A1	*1|*60+*80	280	17.76	96	11	14523	684	253	0.1776	0.14284	0.0987654	0.0647059	0.32044	0.274699	0.302632
CYP2C9	*2|*1	225	14.27	0	0	2	0	0	0.1427	0.142656	0	0	4.41287e-05	0	0
VKORC1	-1639A|-1639A	414	26.25	5	133	6368	416	32	0.2625	0.121994	0.00514403	0.782353	0.140506	0.167068	0.0382775
SLCO1B1	*5|*1A	28	1.78	7	1	4728	164	25	0.0178	0.0865202	0.00720165	0.00588235	0.10432	0.0658635	0.0299043
SLCO1B1	*1A|*1B	53	3.36	171	34	4734	446	250	0.0336	0.0708526	0.175926	0.2	0.104453	0.179116	0.299043
CYP2C9	*1|*3	50	3.17	11	14	4612	281	148	0.0317	0.0700607	0.0113169	0.0823529	0.101761	0.112851	0.177033
CYP3A5	*3|*3	1243	78.82	51	80	38795	1727	477	0.7882	0.0677861	0.0524691	0.470588	0.855986	0.693574	0.570574
CYP2C9	*1|*2	219	13.89	17	0	9260	379	70	0.1389	0.0654158	0.0174897	0	0.204316	0.152209	0.0837321
CYP2C19	*1|*2	182	11.54	163	56	8042	499	255	0.1154	0.0620414	0.167695	0.329412	0.177441	0.200402	0.305024
CYP4F2	*2+*3|*2+*3	139	8.81	3	0	1257	60	23	0.0881	0.0603651	0.00308642	0	0.0277349	0.0240964	0.027512
CYP2C19	*1|*1	715	45.34	259	83	17935	949	223	0.4534	0.0576761	0.266461	0.488235	0.395724	0.381124	0.266746
CYP2D6	*1|*119	91	5.77	0	0	6	0	1	0.0577	0.0575676	0	0	0.000132386	0	0.00119617
CYP4F2	*1|*2+*3	265	16.8	73	22	10219	501	128	0.168	0.0574755	0.0751029	0.129412	0.225475	0.201205	0.15311
SLCO1B1	*14|*1A	128	8.12	1	0	1109	45	3	0.0812	0.0567307	0.00102881	0	0.0244694	0.0180723	0.00358852
CYP2C9	*1|*1	925	58.66	582	154	29096	1628	557	0.5866	0.055384	0.598765	0.905882	0.641984	0.653815	0.666268
UGT1A1	*1|*1	556	35.26	24	48	13604	500	121	0.3526	0.0524367	0.0246914	0.282353	0.300163	0.200803	0.144737
SLCO1B1	*15|*1A	93	5.9	7	1	4728	164	25	0.059	0.0453202	0.00720165	0.00588235	0.10432	0.0658635	0.0299043
UGT1A1	*1|*60	130	8.24	83	38	5739	350	111	0.0824	0.0442273	0.0853909	0.223529	0.126627	0.140562	0.132775
CYP2B6	*1|*1	629	39.89	222	89	20081	960	264	0.3989	0.044174	0.228395	0.523529	0.443074	0.385542	0.315789
TPMT	*1|*3A	43	2.73	3	0	3217	76	5	0.0273	0.043681	0.00308642	0	0.070981	0.0305221	0.00598086
DPYD	c.1129-5923C>G&c.1236G>A (HapB3)|Reference	3	0.19	3	0	1950	68	35	0.0019	0.0411255	0.00308642	0	0.0430255	0.0273092	0.041866
CYP2C19	*17|*2	34	2.16	65	1	2728	150	73	0.0216	0.0385915	0.0668724	0.00588235	0.0601915	0.060241	0.0873206
CYP2B6	*1|*2	22	1.4	26	11	2340	155	24	0.014	0.0376306	0.026749	0.0647059	0.0516306	0.062249	0.0287081
TPMT	*1|*1	1472	93.34	794	164	40617	2301	812	0.9334	0.0372127	0.816872	0.964706	0.896187	0.924096	0.971292
CYP3A5	*1|*3	141	8.94	216	77	5625	529	299	0.0894	0.0347119	0.222222	0.452941	0.124112	0.21245	0.357656
SLCO1B1	*5|*1B	6	0.38	15	2	1590	75	14	0.0038	0.0312823	0.0154321	0.0117647	0.0350823	0.0301205	0.0167464
IFNL3	rs12979860C|rs12979860C	721	45.72	128	147	22115	1161	510	0.4572	0.0307529	0.131687	0.864706	0.487953	0.466265	0.610048
SLCO1B1	*1A|*5	31	1.97	0	0	2269	98	11	0.0197	0.030364	0	0	0.050064	0.0393574	0.0131579
CFTR	Reference|Reference	1555	98.6	945	166	43365	2430	821	0.986	0.0291799	0.972222	0.976471	0.95682	0.975904	0.982057
CFTR	F508del(TCT)|Reference	7	0.44	2	0	1494	26	5	0.0044	0.0285641	0.00205761	0	0.0329641	0.0104418	0.00598086
SLCO1B1	*15|*1B	12	0.76	15	2	1590	75	14	0.0076	0.0274823	0.0154321	0.0117647	0.0350823	0.0301205	0.0167464
UGT1A1	*60|*60+*80	65	4.12	283	4	3058	302	108	0.0412	0.0262728	0.291152	0.0235294	0.0674728	0.121285	0.129187
CYP2B6	*9|*5	39	2.47	0	0	11	0	0	0.0247	0.0244573	0	0	0.000242708	0	0
SLCO1B1	*1A|*35	13	0.82	19	0	1365	59	2	0.0082	0.0219178	0.0195473	0	0.0301178	0.0236948	0.00239234
CYP2C19	*17|*17	37	2.35	57	0	2043	83	28	0.0235	0.0215775	0.058642	0	0.0450774	0.0333333	0.0334928
CYP4F2	*3|*3	35	2.22	2	3	1958	105	43	0.0222	0.021002	0.00205761	0.0176471	0.043202	0.0421687	0.0514354
DPYD	c.2846A>T|Reference	54	3.42	2	0	630	21	0	0.0342	0.0202995	0.00205761	0	0.0139005	0.00843373	0
UGT1A1	*60+*80|*60	41	2.6	31	1	356	25	10	0.026	0.0181451	0.031893	0.00588235	0.00785491	0.0100402	0.0119617
CYP2C9	*2|*2	52	3.3	0	0	792	31	3	0.033	0.015525	0	0	0.017475	0.0124498	0.00358852
CYP2B6	*9|*9	85	5.39	123	7	1746	148	101	0.0539	0.0153757	0.126543	0.0411765	0.0385243	0.0594378	0.120813
CYP2B6	*1|*15	2	0.13	0	0	689	11	0	0.0013	0.0139023	0	0	0.0152023	0.00441767	0
CYP4F2	*2+*3|*3	47	2.98	2	3	1958	105	43	0.0298	0.013402	0.00205761	0.0176471	0.043202	0.0421687	0.0514354
CYP2B6	*2|*9	7	0.44	28	4	762	70	20	0.0044	0.012413	0.0288066	0.0235294	0.016813	0.0281125	0.0239234
CYP2C9	*3|*2	19	1.2	0	0	1	0	0	0.012	0.0119779	0	0	2.20643e-05	0	0
NUDT15	*1|*1	1575	99.87	967	130	44764	2379	738	0.9987	0.0110119	0.994856	0.764706	0.987688	0.955422	0.882775
SLCO1B1	*1B|*1B	14	0.89	307	61	884	200	95	0.0089	0.0106049	0.315844	0.358824	0.0195049	0.0803213	0.113636
CYP2B6	*5|*9	42	2.66	4	0	746	37	19	0.0266	0.01014	0.00411523	0	0.01646	0.0148594	0.0227273
SLCO1B1	*1B|*35	1	0.06	60	0	483	42	4	0.0006	0.0100571	0.0617284	0	0.0106571	0.0168675	0.00478469
CYP2B6	*1|*5	86	5.45	1	0	2032	66	15	0.0545	0.00966526	0.00102881	0	0.0448347	0.026506	0.0179426
SLCO1B1	*1A|*21	11	0.7	1	2	749	31	23	0.007	0.00952619	0.00102881	0.0117647	0.0165262	0.0124498	0.027512
CYP2C19	*1|*35	1	0.06	47	2	447	43	18	0.0006	0.00926276	0.0483539	0.0117647	0.00986276	0.0172691	0.0215311
SLCO1B1	*5|*5	4	0.25	1	0	507	19	3	0.0025	0.00868662	0.00102881	0	0.0111866	0.00763052	0.00358852
SLCO1B1	*14|*15	26	1.65	0	0	355	11	0	0.0165	0.00866716	0	0	0.00783284	0.00441767	0
CYP2B6	*10|*1	13	0.82	0	0	3	0	0	0.0082	0.00813381	0	0	6.6193e-05	0	0
UGT1A1	*60+*80|*60+*80	131	8.31	160	0	4132	286	122	0.0831	0.00806985	0.164609	0	0.0911699	0.114859	0.145933
CYP2D6	*1|*33	1	0.06	1	0	386	15	1	0.0006	0.00791684	0.00102881	0	0.00851684	0.0060241	0.00119617
IFNL3	rs12979860T|rs12979860T	157	9.96	377	0	4156	307	50	0.0996	0.00790061	0.38786	0	0.0916994	0.123293	0.0598086
CYP2B6	*1|*8+*9	1	0.06	1	0	375	4	1	0.0006	0.00767413	0.00102881	0	0.00827413	0.00160643	0.00119617
SLCO1B1	*15|*5	6	0.38	1	0	507	19	3	0.0038	0.00738662	0.00102881	0	0.0111866	0.00763052	0.00358852
SLCO1B1	*5|*15	7	0.44	1	0	507	19	3	0.0044	0.00678662	0.00102881	0	0.0111866	0.00763052	0.00358852
CYP4F2	*3|*2+*3	54	3.42	3	0	1257	60	23	0.0342	0.00646513	0.00308642	0	0.0277349	0.0240964	0.027512
SLCO1B1	*1B|*5	7	0.44	60	0	483	42	4	0.0044	0.00625708	0.0617284	0	0.0106571	0.0168675	0.00478469
SLCO1B1	*14|*14	33	2.09	1	0	674	26	1	0.0209	0.00602864	0.00102881	0	0.0148714	0.0104418	0.00119617
SLCO1B1	*14|*1B	15	0.95	11	0	172	20	3	0.0095	0.00570493	0.0113169	0	0.00379507	0.00803213	0.00358852
SLCO1B1	*1B|*21	1	0.06	5	11	262	20	11	0.0006	0.00518086	0.00514403	0.0647059	0.00578086	0.00803213	0.0131579
SLCO1B1	*5|*35	1	0.06	0	0	262	12	0	0.0006	0.00518086	0	0	0.00578086	0.00481928	0
CYP3A5	*1|*1	16	1.01	257	12	265	104	60	0.0101	0.00425295	0.264403	0.0705882	0.00584705	0.0417671	0.0717703
CYP2B6	*9|*2	7	0.44	0	0	12	0	0	0.0044	0.00413523	0	0	0.000264772	0	0
DPYD	Reference|Reference	1460	92.58	925	170	42142	2362	781	0.9258	0.0040354	0.951646	1	0.929835	0.948594	0.934211
CYP2C9	*2|*3	21	1.33	0	0	773	37	14	0.0133	0.00375574	0	0	0.0170557	0.0148594	0.0167464
CYP2C19	*2|*2	30	1.9	35	11	1021	95	96	0.019	0.00352769	0.0360082	0.0647059	0.0225277	0.0381526	0.114833
CYP2C9	*1|*11	1	0.06	37	0	186	11	4	0.0006	0.00350397	0.0380658	0	0.00410397	0.00441767	0.00478469
CYP2C9	*1|*12	1	0.06	0	0	176	5	0	0.0006	0.00328332	0	0	0.00388332	0.00200803	0
CYP2B6	*15|*9	3	0.19	1	0	233	3	1	0.0019	0.00324099	0.00102881	0	0.00514099	0.00120482	0.00119617
CYP2B6	*1|*11	3	0.19	1	0	232	9	6	0.0019	0.00321893	0.00102881	0	0.00511893	0.00361446	0.00717703
UGT1A1	*60|*60	18	1.14	108	12	654	65	20	0.0114	0.00303008	0.111111	0.0705882	0.0144301	0.0261044	0.0239234
SLCO1B1	*15|*17	8	0.51	0	1	97	16	2	0.0051	0.00295976	0	0.00588235	0.00214024	0.0064257	0.00239234
NUDT15	*1|*3	2	0.13	2	32	185	93	87	0.0013	0.0027819	0.00205761	0.188235	0.0040819	0.0373494	0.104067
CYP2B6	*5|*5	9	0.57	0	0	138	7	3	0.0057	0.00265512	0	0	0.00304488	0.00281124	0.00358852
CYP2B6	*1|*10	9	0.57	0	0	366	20	0	0.0057	0.00237555	0	0	0.00807555	0.00803213	0
CYP2C9	*3|*3	3	0.19	0	0	189	10	9	0.0019	0.00227016	0	0	0.00417016	0.00401606	0.0107656
CFTR	F1052V|Reference	4	0.25	1	0	22	5	0	0.0025	0.00201459	0.00102881	0	0.000485415	0.00200803	0
SLCO1B1	*15|*35	6	0.38	0	0	262	12	0	0.0038	0.00198086	0	0	0.00578086	0.00481928	0
CYP2B6	*15|*1	3	0.19						0.0019	0.0019
CYP2D6	*1|*116	3	0.19	0	0	4	1	0	0.0019	0.00181174	0	0	8.82574e-05	0.000401606	0
SLCO1B1	*17|*1B	3	0.19	1	26	168	37	4	0.0019	0.00180681	0.00102881	0.152941	0.00370681	0.0148594	0.00478469
TPMT	*1|*2	5	0.32	0	0	223	9	0	0.0032	0.00172035	0	0	0.00492035	0.00361446	0
SLCO1B1	*5|*17	1	0.06	0	1	97	16	2	0.0006	0.00154024	0	0.00588235	0.00214024	0.0064257	0.00239234
CYP2D6	*33|*1	1	0.06	0	0	89	2	0	0.0006	0.00136373	0	0	0.00196373	0.000803213	0
CYP2C19	*1|*4	6	0.38	1	0	112	12	0	0.0038	0.00132879	0.00102881	0	0.00247121	0.00481928	0
CYP2B6	*2|*2	1	0.06	0	0	80	8	0	0.0006	0.00116515	0	0	0.00176515	0.00321285	0
CYP2B6	*2|*5	7	0.44	0	0	155	9	0	0.0044	0.00098003	0	0	0.00341997	0.00361446	0
CYP2B6	*5|*2	3	0.19	0	0	42	2	0	0.0019	0.0009733	0	0	0.000926702	0.000803213	0
CYP4F2	*1|*2	5	0.32	277	0	103	84	6	0.0032	0.00092737	0.284979	0	0.00227263	0.0337349	0.00717703
SLCO1B1	*14|*35	5	0.32	5	0	104	7	0	0.0032	0.00090531	0.00514403	0	0.00229469	0.00281124	0
CYP2B6	*11|*5	2	0.13	0	0	18	0	0	0.0013	0.00090284	0	0	0.000397158	0	0
SLCO1B1	*15|*15	19	1.2	1	0	507	19	3	0.012	0.00081338	0.00102881	0	0.0111866	0.00763052	0.00358852
CYP2C19	*17|*4	3	0.19	0	0	51	4	0	0.0019	0.00077472	0	0	0.00112528	0.00160643	0
SLCO1B1	*17|*1A	19	1.2	0	6	577	43	2	0.012	0.00073112	0	0.0352941	0.0127311	0.0172691	0.00239234
SLCO1B1	*14|*17	2	0.13	0	0	26	3	0	0.0013	0.00072633	0	0	0.000573673	0.00120482	0
CYP2B6	*10|*5	2	0.13	0	0	27	0	0	0.0013	0.00070426	0	0	0.000595737	0	0
CYP2B6	*10|*9	5	0.32	0	0	118	12	3	0.0032	0.00059641	0	0	0.00260359	0.00481928	0.00358852
CFTR	G1069R|Reference	1	0.06	0	3	1	0	0	0.0006	0.00057794	0	0.0176471	2.20643e-05	0	0
CYP2B6	*10|*10	1	0.06	0	0	1	0	0	0.0006	0.00057794	0	0	2.20643e-05	0	0
CYP2B6	*11|*1	1	0.06	0	0	1	0	0	0.0006	0.00057794	0	0	2.20643e-05	0	0
TPMT	*3A|*3A	2	0.13	0	0	85	2	1	0.0013	0.00057547	0	0	0.00187547	0.000803213	0.00119617
SLCO1B1	*1A|*27	1	0.06	10	0	2	6	0	0.0006	0.00055587	0.0102881	0	4.41287e-05	0.00240964	0
CYP2B6	*5+*9|*9	1	0.06	0	0	3	0	0	0.0006	0.00053381	0	0	6.6193e-05	0	0
CYP2C9	*3|*45	1	0.06	0	0	3	0	0	0.0006	0.00053381	0	0	6.6193e-05	0	0
DPYD	c.2846A>T|c.2846A>T	1	0.06	0	0	6	1	0	0.0006	0.00046761	0	0	0.000132386	0.000401606	0
SLCO1B1	*17|*17	1	0.06	0	1	6	5	0	0.0006	0.00046761	0	0.00588235	0.000132386	0.00200803	0
SLCO1B1	*1A|*1B+*26	1	0.06	0	0	6	0	0	0.0006	0.00046761	0	0	0.000132386	0	0
SLCO1B1	*21|*5	2	0.13	0	0	38	0	0	0.0013	0.00046156	0	0	0.000838445	0	0
CYP2C19	*1|*8	5	0.32	0	0	165	4	0	0.0032	0.00044062	0	0	0.00364062	0.00160643	0
CYP4F2	*2|*2+*3	1	0.06	20	0	12	14	2	0.0006	0.00033523	0.0205761	0	0.000264772	0.00562249	0.00239234
SLCO1B1	*14|*21	2	0.13	0	0	46	2	0	0.0013	0.00028504	0	0	0.00101496	0.000803213	0
SLCO1B1	*14|*5	12	0.76	0	0	355	11	0	0.0076	0.00023284	0	0	0.00783284	0.00441767	0
CYP2B6	*10|*2	1	0.06	2	0	18	3	0	0.0006	0.00020284	0.00205761	0	0.000397158	0.00120482	0
CYP2B6	*15|*5	1	0.06	0	0	36	1	0	0.0006	0.00019432	0	0	0.000794316	0.000401606	0
SLCO1B1	*17|*21	1	0.06	0	1	19	4	0	0.0006	0.00018078	0	0.00588235	0.000419222	0.00160643	0
SLCO1B1	*15|*21	4	0.25	0	2	118	8	2	0.0025	0.00010359	0	0.0117647	0.00260359	0.00321285	0.00239234
CYP4F2	*2|*3	1	0.06	14	1	24	10	1	0.0006	7.0456e-05	0.0144033	0.00588235	0.000529544	0.00401606	0.0012
SLCO1B1	*35|*35	1	0.06	4	0	27	2	0	0.0006	4.263e-06	0.00411523	0	0.000595737	0.000803213	0
CFTR	Reference|F1052V	3	0.19						0.0019
CFTR	Reference|F508del(TCT)	7	0.44						0.0044
CYP2B6	*1|*22	7	0.44						0.0044
CYP2B6	*1|*22+*3	1	0.06						0.0006
CYP2B6	*1|*22+*9	1	0.06						0.0006
CYP2B6	*18|*1	1	0.06						0.0006
CYP2B6	*2+*5|*1	1	0.06						0.0006
CYP2B6	*2|*1	18	1.14						0.0114
CYP2B6	*22+*3|*1	3	0.19						0.0019
CYP2B6	*22|*1	10	0.63						0.0063
CYP2B6	*22|*5	1	0.06						0.0006
CYP2B6	*22|*9	4	0.25						0.0025
CYP2B6	*5|*1	87	5.52						0.0552
CYP2B6	*5|*10	1	0.06						0.0006
CYP2B6	*5|*22	2	0.13						0.0013
CYP2B6	*9|*1	227	14.39						0.1439
CYP2B6	*9|*10	3	0.19						0.0019
CYP2B6	*9|*22	1	0.06						0.0006
CYP2C19	*17|*1	177	11.22						0.1122
CYP2C19	*2|*1	163	10.34						0.1034
CYP2C19	*2|*17	43	2.73						0.0273
CYP2C19	*35|*1	1	0.06						0.0006
CYP2C19	*35|*2	1	0.06						0.0006
CYP2C19	*4|*1	6	0.38						0.0038
CYP2C19	*4|*2	1	0.06						0.0006
CYP2C19	*8|*1	6	0.38						0.0038
CYP2C9	*12|*1	1	0.06						0.0006
CYP2C9	*2+*6|*1	2	0.13						0.0013
CYP2C9	*3|*1	57	3.61						0.0361
CYP2D6	*1+chr22.g.42523613C>T|*1	2	0.13						0.0013
CYP2D6	*1+chr22.g.42523613C>T|*1+chr22.g.42526694G>A	1	0.06						0.0006
CYP2D6	*1+chr22.g.42525772G>A|*1	3	0.19						0.0019
CYP2D6	*1+chr22.g.42526694G>A|*1	213	13.51						0.1351
CYP2D6	*1+chr22.g.42526694G>A|*1+chr22.g.42525772G>A	2	0.13						0.0013
CYP2D6	*1+chr22.g.42526694G>A|*1+chr22.g.42526694G>A	95	6.02						0.0602
CYP2D6	*1+chr22.g.42526694G>A|*1+chr22.g.42526763C>T	13	0.82						0.0082
CYP2D6	*1+chr22.g.42526694G>A|*1+chr22.g.42526775C>T+chr22.g.42525089G>C	1	0.06						0.0006
CYP2D6	*1+chr22.g.42526694G>A|*119	41	2.6						0.026
CYP2D6	*1+chr22.g.42526763C>T|*1	39	2.47						0.0247
CYP2D6	*1+chr22.g.42526763C>T|*1+chr22.g.42526694G>A	16	1.01						0.0101
CYP2D6	*1+chr22.g.42526763C>T|*1+chr22.g.42526763C>T	4	0.25						0.0025
CYP2D6	*1+chr22.g.42526763C>T|*119	5	0.32						0.0032
CYP2D6	*1+chr22.g.42526775C>T+chr22.g.42525089G>C|*1	5	0.32						0.0032
CYP2D6	*1+chr22.g.42526775C>T+chr22.g.42525089G>C|*1+chr22.g.42526694G>A	2	0.13						0.0013
CYP2D6	*1+chr22.g.42526775C>T+chr22.g.42525089G>C|*119	1	0.06						0.0006
CYP2D6	*1|*1+chr22.g.42525772G>A	3	0.19						0.0019
CYP2D6	*1|*1+chr22.g.42526694G>A	210	13.32						0.1332
CYP2D6	*1|*1+chr22.g.42526763C>T	41	2.6						0.026
CYP2D6	*1|*1+chr22.g.42526775C>T+chr22.g.42525089G>C	7	0.44						0.0044
CYP2D6	*116|*1	1	0.06						0.0006
CYP2D6	*119|*1	84	5.33						0.0533
CYP2D6	*119|*1+chr22.g.42526694G>A	36	2.28						0.0228
CYP2D6	*119|*1+chr22.g.42526763C>T	5	0.32						0.0032
CYP2D6	*119|*1+chr22.g.42526775C>T+chr22.g.42525089G>C	2	0.13						0.0013
CYP2D6	*119|*119	28	1.78						0.0178
CYP2D6	*53|*1+chr22.g.42526763C>T	1	0.06						0.0006
CYP3A5	*3|*1	163	10.34						0.1034
CYP3A5	*3|*6+chr7.g.99270539C>T	8	0.51						0.0051
CYP3A5	*6+chr7.g.99270539C>T|*3	6	0.38						0.0038
CYP4F2	*2+*3|*1	257	16.3						0.163
CYP4F2	*2+*3|*2	1	0.06						0.0006
CYP4F2	*2|*1	5	0.32						0.0032
CYP4F2	*3|*1	113	7.17						0.0717
DPYD	Reference|c.1129-5923C>G&c.1236G>A (HapB3)	4	0.25						0.0025
DPYD	Reference|c.1905&1G>A	1	0.06						0.0006
DPYD	Reference|c.2846A>T	54	3.42						0.0342
SLCO1B1	*14+chr12.g.21283322G>Aor*21+chr12.g.21329813C>A|*14	1	0.06						0.0006
SLCO1B1	*14+chr12.g.21283322G>Aor*21+chr12.g.21329813C>A|*1B	1	0.06						0.0006
SLCO1B1	*14+chr12.g.21391976A>Cor*35+chr12.g.21329813C>A|*14	1	0.06						0.0006
SLCO1B1	*14+chr12.g.21391976A>Cor*35+chr12.g.21329813C>A|*1A	1	0.06						0.0006
SLCO1B1	*14|*1A+chr12.g.21283322G>A	4	0.25						0.0025
SLCO1B1	*14|*35+chr12.g.21283322G>Aor*21+chr12.g.21391976A>C	12	0.76						0.0076
SLCO1B1	*15|*14	24	1.52						0.0152
SLCO1B1	*15|*17+chr12.g.21391976A>C	1	0.06						0.0006
SLCO1B1	*15|*1A+chr12.g.21283322G>A	1	0.06						0.0006
SLCO1B1	*15|*35+chr12.g.21283322G>Aor*21+chr12.g.21391976A>C	8	0.51						0.0051
SLCO1B1	*15|*35+chr12.g.21331549T>Cor*15+chr12.g.21391976A>C	1	0.06						0.0006
SLCO1B1	*17|*14	8	0.51						0.0051
SLCO1B1	*17|*15	5	0.32						0.0032
SLCO1B1	*17|*35+chr12.g.21283322G>Aor*21+chr12.g.21391976A>C	2	0.13						0.0013
SLCO1B1	*1A+chr12.g.21283322G>A|*14	2	0.13						0.0013
SLCO1B1	*1A+chr12.g.21283322G>A|*1A	8	0.51						0.0051
SLCO1B1	*1A+chr12.g.21283322G>A|*1B	1	0.06						0.0006
SLCO1B1	*1A+chr12.g.21283322G>A|*35	1	0.06						0.0006
SLCO1B1	*1A+chr12.g.21283322G>A|*35+chr12.g.21283322G>Aor*21+chr12.g.21391976A>C	1	0.06						0.0006
SLCO1B1	*1A+chr12.g.21283322G>A|*5	1	0.06						0.0006
SLCO1B1	*1A|*14	102	6.47						0.0647
SLCO1B1	*1A|*14+chr12.g.21391976A>Cor*35+chr12.g.21329813C>A	1	0.06						0.0006
SLCO1B1	*1A|*15	95	6.02						0.0602
SLCO1B1	*1A|*17	11	0.7						0.007
SLCO1B1	*1A|*1A+chr12.g.21283322G>A	17	1.08						0.0108
SLCO1B1	*1A|*35+chr12.g.21283322G>Aor*21+chr12.g.21391976A>C	41	2.6						0.026
SLCO1B1	*1B+*26|*1A	1	0.06						0.0006
SLCO1B1	*1B+*26|*35+chr12.g.21283322G>Aor*21+chr12.g.21391976A>C	1	0.06						0.0006
SLCO1B1	*1B|*14	11	0.7						0.007
SLCO1B1	*1B|*15	16	1.01						0.0101
SLCO1B1	*1B|*17	3	0.19						0.0019
SLCO1B1	*1B|*1A	59	3.74						0.0374
SLCO1B1	*1B|*1A+chr12.g.21283322G>A	1	0.06						0.0006
SLCO1B1	*1B|*35+chr12.g.21283322G>Aor*21+chr12.g.21391976A>C	7	0.44						0.0044
SLCO1B1	*21|*15	2	0.13						0.0013
SLCO1B1	*21|*17	3	0.19						0.0019
SLCO1B1	*21|*1A	11	0.7						0.007
SLCO1B1	*21|*1B	2	0.13						0.0013
SLCO1B1	*35+chr12.g.21283322G>Aor*21+chr12.g.21391976A>C|*14	5	0.32						0.0032
SLCO1B1	*35+chr12.g.21283322G>Aor*21+chr12.g.21391976A>C|*15	9	0.57						0.0057
SLCO1B1	*35+chr12.g.21283322G>Aor*21+chr12.g.21391976A>C|*17	2	0.13						0.0013
SLCO1B1	*35+chr12.g.21283322G>Aor*21+chr12.g.21391976A>C|*1A	42	2.66						0.0266
SLCO1B1	*35+chr12.g.21283322G>Aor*21+chr12.g.21391976A>C|*1A+chr12.g.21283322G>A	1	0.06						0.0006
SLCO1B1	*35+chr12.g.21283322G>Aor*21+chr12.g.21391976A>C|*1B	3	0.19						0.0019
SLCO1B1	*35+chr12.g.21283322G>Aor*21+chr12.g.21391976A>C|*21	2	0.13						0.0013
SLCO1B1	*35+chr12.g.21283322G>Aor*21+chr12.g.21391976A>C|*35+chr12.g.21283322G>Aor*21+chr12.g.21391976A>C	6	0.38						0.0038
SLCO1B1	*35+chr12.g.21283322G>Aor*21+chr12.g.21391976A>C|*5	6	0.38						0.0038
SLCO1B1	*35+chr12.g.21331549T>Cor*15+chr12.g.21391976A>C|*14	1	0.06						0.0006
SLCO1B1	*35|*14	4	0.25						0.0025
SLCO1B1	*35|*15	9	0.57						0.0057
SLCO1B1	*35|*1A	17	1.08						0.0108
SLCO1B1	*35|*1A+chr12.g.21283322G>A	2	0.13						0.0013
SLCO1B1	*35|*1B	5	0.32						0.0032
SLCO1B1	*35|*35+chr12.g.21283322G>Aor*21+chr12.g.21391976A>C	2	0.13						0.0013
SLCO1B1	*5|*14	5	0.32						0.0032
SLCO1B1	*5|*1B+*26	1	0.06						0.0006
SLCO1B1	*5|*35+chr12.g.21283322G>Aor*21+chr12.g.21391976A>C	2	0.13						0.0013
TPMT	*1|*5	1	0.06						0.0006
TPMT	*16|*1	1	0.06						0.0006
TPMT	*2|*1	2	0.13						0.0013
TPMT	*3A|*1	51	3.23						0.0323
UGT1A1	*60+*80|*1	245	15.54						0.1554
UGT1A1	*60|*1	111	7.04						0.0704
VKORC1	-1639G|-1639A	388	24.6						0.246

## Sheet: ST5
gene	phenotype_presumptive	sard_count	african_phenotype_count	east_asian_phenotype_count	european_phenotype_count	south_asian_phenotype_count	other_phenotype_count	sard_freq	abs_delta_eur	african_phenotype_frequency	east_asian_phenotype_frequency	european_phenotype_frequency	other_phenotype_frequency	south_asian_phenotype_frequency
CYP2D6	Not available	748	101	6	695	11	44	0.474318	0.458984	0.103909	0.0352941	0.0153347	0.0176707	0.0131579
CYP2D6	Intermediate Metabolizer	0	242	76	16563	201	767	0	-0.365452	0.248971	0.447059	0.365452	0.308032	0.240431
SLCO1B1	Normal Function	533	543	111	25375	636	1405	0.337984	-0.221899	0.558642	0.652941	0.559883	0.564257	0.760766
SLCO1B1	Possible Decreased Function	335	72	0	4	0	17	0.212429	0.21234	0.0740741	0	8.8257e-05	0.00682731	0
CYP4F2	Not available	764	98	25	13446	196	680	0.484464	0.187787	0.100823	0.147059	0.296677	0.273092	0.23445
VKORC1	Normal warfarin dose	385	842	2	17897	560	1029	0.244134	-0.150751	0.866255	0.0117647	0.394885	0.413253	0.669856
CYP4F2	Normal dose phenotype	534	506	100	22168	349	1130	0.338618	-0.150505	0.520576	0.588235	0.489122	0.453815	0.417464
CYP2D6	Normal Metabolizer	622	584	86	24429	586	1553	0.39442	-0.14459	0.600823	0.505882	0.53901	0.623695	0.700957
VKORC1	Decreased warfarin dose	414	5	133	6368	32	416	0.262524	0.122018	0.00514403	0.782353	0.140506	0.167068	0.0382775
CYP2D6	Indeterminate	207	34	0	752	21	41	0.131262	0.11467	0.0349794	0	0.0165924	0.0164659	0.0251196
SLCO1B1	Possible Increased Function	0	101	0	3934	13	201	0	-0.0868011	0.103909	0	0.0868011	0.0807229	0.0155502
CYP3A5	Poor Metabolizer	1243	238	81	39390	477	1812	0.788205	-0.0809089	0.244856	0.476471	0.869114	0.727711	0.571
SLCO1B1	Not available	201	31	3	2459	76	188	0.127457	0.073201	0.031893	0.0176471	0.0542562	0.075502	0.0909091
CYP3A5	Intermediate Metabolizer	304	477	77	5666	299	574	0.192771	0.0677545	0.490741	0.452941	0.125017	0.230522	0.357656
CYP2D6	Poor Metabolizer	0	11	2	2883	17	85	0	-0.0636115	0.0113169	0.0117647	0.0636115	0.0341366	0.0203349
CYP2C19	Normal Metabolizer	715	291	83	17943	223	966	0.453393	0.0574921	0.299383	0.488235	0.3959	0.387952	0.266746
UGT1A1	Normal Metabolizer	815	223	101	20832	262	951	0.516804	0.0571597	0.229424	0.594118	0.459644	0.381928	0.313397
CYP2C9	Normal Metabolizer	925	717	154	29099	557	1661	0.586557	-0.0554935	0.737654	0.905882	0.64205	0.667068	0.666268
CYP2C19	Rapid Metabolizer	343	231	0	12285	136	568	0.217502	-0.0535588	0.237654	0	0.27106	0.228112	0.162679
CYP2C9	Intermediate Metabolizer	606	243	16	15161	249	766	0.384274	0.0497565	0.25	0.0941176	0.334517	0.297847	0.307631
UGT1A1	Intermediate Metabolizer	0	82	39	2002	58	165	0	-0.0441728	0.0843621	0.229412	0.0441728	0.0662651	0.069378
CYP4F2	Increased dose phenotype	268	40	44	9578	284	576	0.169943	-0.0413893	0.0411523	0.258824	0.211332	0.231325	0.339713
TPMT	Normal Function	1472	794	164	40617	812	2301	0.933418	0.0372306	0.816872	0.964706	0.896187	0.924096	0.971292
TPMT	Intermediate Function	101	88	5	4435	20	148	0.0640457	-0.0338097	0.090535	0.0294118	0.0978553	0.0594377	0.0239234
IFNL3	Unfavorable response genotype	856	844	23	23207	326	1329	0.542803	0.0307557	0.868313	0.135294	0.512047	0.533735	0.389952
IFNL3	Favorable response genotype	721	128	147	22115	510	1161	0.457197	-0.0307557	0.131687	0.864706	0.487953	0.466265	0.610048
CFTR	ivacaftor irrelevant	1555	945	166	43365	821	2430	0.986049	0.0292294	0.972222	0.976471	0.95682	0.975904	0.982057
VKORC1	Possibly decreased warfarin dose	778	125	35	21057	244	1045	0.493342	0.028733	0.128601	0.205882	0.464609	0.419679	0.291866
CFTR	ivacaftor non-responsive	14	2	0	1494	5	26	0.00887762	-0.0240865	0.00205761	0	0.0329641	0.0104418	0.00598086
CYP2C19	Intermediate Metabolizer	450	305	67	11869	351	745	0.285352	0.0234703	0.313786	0.394118	0.261882	0.299197	0.419856
CYP2C19	Ultrarapid Metabolizer	37	57	0	2043	28	83	0.0234623	-0.0216152	0.058642	0	0.0450774	0.0333333	0.0334928
SLCO1B1	Indeterminate	133	190	18	2904	45	174	0.0843374	0.0202625	0.195473	0.105882	0.0640748	0.0698795	0.0538278
CYP2B6	Rapid Metabolizer	20	1	1	15	0	2	0.0126823	0.0123513	0.00102881	0.00588235	0.00033097	0.00080321	0
CYP2B6	Indeterminate	50	8	0	1993	17	89	0.0317058	-0.0122685	0.00823045	0	0.0439742	0.035743	0.0203349
NUDT15	Normal Metabolizer	1575	967	130	44764	738	2379	0.998732	0.0110437	0.994856	0.764706	0.987688	0.955422	0.882775
SLCO1B1	Poor Function	51	2	3	1000	5	64	0.0323399	0.0102756	0.00205761	0.0176471	0.0220643	0.0257028	0.00598
UGT1A1	Not available	762	659	25	22309	509	1354	0.483196	-0.00903741	0.677984	0.147059	0.492233	0.543775	0.608852
CYP3A5	Not available	14						0.00887762	0.00887762
NUDT15	Intermediate Metabolizer	0	2	34	385	89	102	0	-0.00849477	0.00205761	0.2	0.00849477	0.0409639	0.106459
SLCO1B1	Decreased Function	324	27	35	9646	61	439	0.205453	-0.00737923	0.0277778	0.205882	0.212833	0.176305	0.0729665
CYP2B6	Intermediate Metabolizer	552	458	60	15567	377	959	0.350032	0.00655614	0.471193	0.352941	0.343476	0.385141	0.450957
CYP2C9	Poor Metabolizer	44	3	0	997	26	54	0.0279011	0.00590293	0.00308642	0	0.0219982	0.0311005	0.0216868
CFTR	ivacaftor responsive	8	25	4	461	10	34	0.00507292	-0.00509874	0.0257202	0.0235294	0.0101717	0.0136546	0.0119617
DPYD	Intermediate Metabolizer	117	46	0	3149	54	128	0.0741915	0.00471089	0.0473251	0	0.0694806	0.0514056	0.0645933
CYP3A5	Normal Metabolizer	16	257	12	265	60	104	0.0101458	0.0042988	0.264403	0.0705882	0.00584705	0.0417671	0.0717703
CYP4F2	Indeterminate	11	328	1	130	7	104	0.00697527	0.00410691	0.337449	0.00588235	0.00286836	0.0417671	0.00837321
DPYD	Normal Metabolizer	1460	925	170	42142	781	2362	0.925809	-0.0040269	0.951646	1	0.929835	0.948594	0.934211
CYP2C19	Poor Metabolizer	32	49	20	1098	97	113	0.0202917	-0.00393495	0.0504115	0.117647	0.0242266	0.0453815	0.116029
UGT1A1	Poor Metabolizer	0	7	5	166	7	20	0	-0.00366268	0.00720165	0.0294118	0.00366268	0.00803213	0.00837321
CYP2B6	Poor Metabolizer	85	208	8	2578	132	207	0.0538998	-0.00298206	0.213992	0.0470588	0.0568819	0.0831325	0.157895
CYP2B6	Not available	8	45	1	335	4	24	0.00507292	-0.00231863	0.0462963	0.00588235	0.00739155	0.00963855	0.00478469
TPMT	Indeterminate	2	79	1	136	3	30	0.00126823	-0.00173252	0.0812757	0.00588235	0.00300075	0.0120482	0.00358852
NUDT15	Indeterminate	2	2	6	132	3	6	0.00126823	-0.00164426	0.00205761	0.0352941	0.00291249	0.00240964	0.00358852
CYP2C19	Not available	0	3	0	66	1	6	0	-0.00145625	0.00308642	0	0.00145625	0.00240964	0.00119617
TPMT	Poor Function	2	5	0	123	1	4	0.00126823	-0.00144568	0.00514403	0	0.00271391	0.00160643	0.0012
CYP2B6	Normal Metabolizer	862	252	100	24829	306	1208	0.546607	-0.00122801	0.259259	0.588235	0.547835	0.485141	0.366029
NUDT15	Not available	0	1	0	38	0	0	0	-0.00083844	0.00102881	0	0.00083844	0	0
DPYD	Poor Metabolizer	0	0	0	21	1	0	0	-0.00046335	0	0	0.00046335	0	0.00119617
CYP2C9	Indeterminate	0	0	0	13	2	3	0	-0.00028684	0	0	0.00028684	0.00120482	0.00239234
UGT1A1	Indeterminate	0	1	0	13	0	0	0	-0.00028684	0.00102881	0	0.00028684	0	0
DPYD	Not available	0	1	0	10	0	0	0	-0.00022064	0.00102881	0	0.00022064	0	0
CYP2C19	Indeterminate	0	6	0	9	0	3	0	-0.00019858	0.00617284	0	0.00019858	0.00120482	0
CYP2C19	Likely Intermediate Metabolizer	0	23	0	9	0	3	0	-0.00019858	0.0236626	0	0.00019858	0.00120482	0
TPMT	Possible Intermediate Metabolizer	0	4	0	8	0	5	0	-0.00017651	0.00411523	0	0.00017651	0.00200803	0
CYP2C9	Not available	2	9	0	52	2	6	0.00126823	0.00012088	0.00925926	0	0.00114735	0.00240964	0.00239234
CYP2B6	Ultrarapid Metabolizer	0	0	0	5	0	1	0	-0.00011032	0	0	0.00011032	0.00040161	0
TPMT	Not available	0	2	0	3	0	2	0	-6.6193e-05	0.00205761	0	6.6193e-05	0.00080321	0
CFTR	Not available	0	0	0	2	0	0	0	-4.4129e-05	0	0	4.4129e-05	0	0
NUDT15	Poor Metabolizer	0	0	0	2	6	3	0	-4.4129e-05	0	0	4.4129e-05	0.00120482	0.00718
CYP3A5	Indeterminate	0	0	0	1	0	0	0	-2.2064e-05	0	0	2.2064e-05	0	0
NUDT15	Possible Intermediate Metabolizer	0	0	0	1	0	0	0	-2.2064e-05	0	0	2.2064e-05	0	0
CYP2C19	Likely Poor Metabolizer	0	7	0	0	0	3	0	0	0.00720165	0	0	0.00120482	0
SLCO1B1	Possible Poor Function	0	6	0	0	0	2	0	0	0.00617284	0	0	0.00080321	0

## Sheet: -- ST2 (ex 1)
Number of individuals	Number of drugs for which an atypical response is expected
1	39
3	38
6	37
12	36
16	35
14	34
5	33
7	32
5	31
19	30
38	29
57	28
47	27
49	26
40	25
45	24
43	23
51	22
36	21
34	20
42	19
92	18
132	17
125	16
127	15
89	14
58	13
58	12
22	11
22	10
12	9
11	8
2	7
9	6
27	5
49	4
68	3
55	2
40	1
1568

## Sheet: ST6
Variant/Haplotypes	frequency in Sardinians vs EUR	Gene	Level of Evidence	Level Modifiers	Phenotype Category	Drug(s)	Phenotype(s)	Pediatric
rs6977820	lower		3		Toxicity	antipsychotics	Schizophrenia;tardive dyskinesia	0
rs3130907	lower	HCP5	3		Toxicity	carboplatin;gemcitabine	Carcinoma, Non-Small-Cell Lung;Thrombocytopenia	0
rs2239622	lower	NGF	3		Dosage	methadone	Heroin Dependence;Opioid-Related Disorders	0
rs4291	lower	ACE	3	Tier 1 VIP	Efficacy	amlodipine;chlorthalidone;lisinopril	Hypertension	0
rs4291	lower	ACE	3	Tier 1 VIP	Toxicity	aspirin	Asthma	0
rs4291	lower	ACE	3	Tier 1 VIP	Efficacy	captopril	Alzheimer Disease	0
rs4292	lower	ACE	3	Tier 1 VIP	Toxicity	aspirin	Asthma	0
rs1060467	lower	CYP4F11	3		Dosage	warfarin		0
rs6920220	lower	SH3BP2;TNFAIP3	3		Efficacy	Tumor necrosis factor alpha (TNF-alpha) inhibitors	Arthritis, Psoriatic;Psoriasis	0
rs6920220	lower	TNFAIP3	3		Efficacy	methotrexate		0
rs1126442	lower	GRIN1	3		Toxicity	methamphetamine	Psychotic Disorders	0
rs1264457	lower	HLA-E	3		Efficacy	adalimumab;certolizumab pegol;etanercept;glucocorticoids;infliximab;methotrexate	Arthritis, Rheumatoid	0
rs3094086	lower	MUCL3	3		Toxicity	carboplatin;gemcitabine	Carcinoma, Non-Small-Cell Lung;Thrombocytopenia	0
rs12819210	lower	OASL	3		Efficacy	peginterferon alfa-2b;ribavirin	Hepatitis C	0
rs962369	lower	BDNF	3		Toxicity	escitalopram;nortriptyline	Depressive Disorder, Major	0
rs12502866	lower		3		Efficacy	duloxetine	Depressive Disorder, Major	0
rs13429709	lower	GCG	3		Other	clozapine;olanzapine	Schizophrenia	0
rs3768142	lower	MTR	3		Toxicity	methotrexate	Agranulocytosis	1
rs7103411	lower	BDNF	4		Efficacy	citalopram	Depressive Disorder, Major	0
rs1006737	lower	CACNA1C	3		Toxicity	citalopram	Depressive Disorder, Major	0
rs4639250	lower	TTC37	3		Efficacy	duloxetine	Depressive Disorder, Major	0
rs34834489	lower	SLC47A2	3		Metabolism/PK	metformin		0
rs1883322	lower	PPARD	3		Efficacy	docetaxel;thalidomide	Prostatic Neoplasms	0
rs11144870	lower	RFK	3		Efficacy	citalopram;escitalopram	Depressive Disorder	0
rs1800629	lower	TNF	3		Efficacy	Tumor necrosis factor alpha (TNF-alpha) inhibitors		0
rs1800629	lower	TNF	3		Efficacy	cyclosporine;mycophenolate mofetil	Kidney Transplantation	0
rs1800629	lower	TNF	3		Other	atorvastatin	Acute coronary syndrome	0
rs1800629	lower	LTA;TNF	3		Toxicity	carbamazepine	Hypersensitivity	0
rs1800629	lower	TNF	3		Toxicity	ethambutol;isoniazid;pyrazinamide;rifampin	Toxic liver disease;Tuberculosis	0
rs1800629	lower	TNF	3		Toxicity	sorafenib	Carcinoma, Hepatocellular;hand-foot syndrome	0
rs1800629	lower	TNF	3		Toxicity	carboplatin;gemcitabine	Carcinoma, Non-Small-Cell Lung;Thrombocytopenia	0
rs340874	lower	PROX1	3		Toxicity	atenolol	Hypertension	0
rs2514036	lower	ACY3	3		Efficacy	bisoprolol	Hypertension	0
rs9349256	lower	ABCC10	3		Toxicity	tenofovir		0
rs4673	lower	CYBA	3		Other	simvastatin	Hypercholesterolemia	0
rs4673	lower	CYBA	3		Toxicity	doxorubicin;idarubicin	Neoplasms	0
rs4673	lower	CYBA	3		Toxicity	cisplatin;doxorubicin	Anemia;mucositis;Osteosarcoma	1
rs4673	lower	CYBA	3		Efficacy;Toxicity	doxorubicin;idarubicin	Neoplasms	0
rs7624766	lower		4		Efficacy	methotrexate	Arthritis, Rheumatoid	0
rs1495509	lower	KCNIP4	3		Toxicity	Ace Inhibitors, Plain		0
rs5882	lower	CETP	3		Efficacy	fluvastatin	Hypercholesterolemia	0
rs5882	lower	CETP	3		Efficacy	simvastatin	Hypercholesterolemia	0
rs5882	lower	CETP	3		Efficacy	rosuvastatin		0
rs4790694	lower	ARRB2	3		Toxicity	methamphetamine	Substance-Related Disorders	0
rs510432	lower	ATG5	3		Efficacy	adalimumab	Inflammatory Bowel Diseases	0
rs4760658	lower	VDR	3		Dosage	warfarin		0
rs4541111	lower	AXIN2	3		Efficacy	Platinum compounds	Carcinoma, Non-Small-Cell Lung	0
rs9936750	lower		3		Toxicity	capecitabine	Neoplasms	0
rs6064463	lower		4		Efficacy	methotrexate	Arthritis, Rheumatoid	0
rs6475448	lower	MLLT3	3		Efficacy	montelukast	Asthma	1
rs1047303	lower	HSD3B1	3		Efficacy	glucocorticoids	Asthma	0
rs4783961	lower	CETP	3		Efficacy	fluvastatin	Hypercholesterolemia	0
rs4344	lower	ACE	3	Tier 1 VIP	Efficacy	ramipril	Hypertension	0
rs12579720	lower	PDE3A	3	Rare Variant	Efficacy	hydrochlorothiazide	Hypertension	0
rs3734254	lower	PPARD	3		Efficacy	docetaxel;thalidomide	Prostatic Neoplasms	0
rs2472297	lower	CYP1A1	3		Metabolism/PK	olanzapine	Psychotic Disorders	0
rs1433099	lower	LDLR	3		Efficacy	pravastatin	Vascular Diseases	0
rs1521470	lower	ADCY1	3		Efficacy	lithium	Bipolar Disorder	0
rs4516035	lower	VDR	3		Metabolism/PK	midazolam		0
rs1353295	lower	AREG	3		Efficacy	cetuximab;irinotecan;panitumumab	Colorectal Neoplasms	0
rs2070744	lower	NOS3	3		Efficacy	Antihypertensives;Antihypertensives And Diuretics In Combination;diuretics	Hypertension	0
rs2070744	lower	NOS3	3		Efficacy	Antihypertensives And Diuretics In Combination		0
rs2070744	lower	NOS3	3		Efficacy	cyclophosphamide;doxorubicin;fluorouracil;methotrexate	Breast Neoplasms	0
rs2070744	lower	NOS3	3		Efficacy	sildenafil	Erectile Dysfunction	0
rs2070744	lower	NOS3	3		Efficacy	sorafenib	Carcinoma, Hepatocellular	0
rs2070744	lower	NOS3	3		Efficacy	enalapril	Hypertension	0
rs4359	lower	ACE	3	Tier 1 VIP	Efficacy	ramipril	Hypertension	0
rs145489027	lower	KCNIP4	3		Toxicity	Ace Inhibitors, Plain		0
rs7675300	lower	KCNIP4	4		Toxicity	Ace Inhibitors, Plain		0
rs16870989	lower	KCNIP4	4		Toxicity	Ace Inhibitors, Plain		0
rs6467136	lower	PAX4	3		Efficacy	rosiglitazone	Diabetes Mellitus, Type 2	0
rs209474	lower		3		Efficacy	lithium	Bipolar Disorder	0
rs1979277	lower	SHMT1	3		Efficacy	bevacizumab;fluorouracil;irinotecan;leucovorin	Colorectal Neoplasms	0
rs1979277	lower	SHMT1	3		Toxicity	methotrexate	Precursor Cell Lymphoblastic Leukemia-Lymphoma	1
rs2016520	lower	PPARD	3		Efficacy	docetaxel;thalidomide	Prostatic Neoplasms	0
rs231775	lower	CTLA4	3		Toxicity	Antiinflammatory agents, non-steroids		0
rs231775	lower	CTLA4	3		Toxicity	cyclosporine	Kidney Transplantation	0
rs4343	lower	ACE	3	Tier 1 VIP	Efficacy	spironolactone		0
rs4343	lower	ACE	3	Tier 1 VIP	Efficacy	sildenafil	Erectile Dysfunction	0
rs1801274	lower	FCGR2A	3		Efficacy	cetuximab	Colorectal Neoplasms;Head and Neck Neoplasms	0
rs1801274	lower	FCGR2A	3		Efficacy	rituximab	Arthritis, Rheumatoid	0
rs1801274	lower	FCGR2A	3		Efficacy	adalimumab;infliximab	Arthritis, Rheumatoid	0
rs1801274	lower	FCGR2A	4		Efficacy	adalimumab;etanercept;infliximab	Psoriasis	0
rs1801274	lower	FCGR2A	3		Efficacy	trastuzumab	Breast Neoplasms	0
rs4788863	lower	SLC16A5	3		Toxicity	cisplatin	Neoplasms;Ototoxicity;Testicular Neoplasms	1
rs7196161	lower	VKORC1	3	Tier 1 VIP	Dosage	warfarin		0
rs4341	lower	ACE	3	Tier 1 VIP	Toxicity	Thiazides, plain	Diabetes Mellitus	0
rs4341	lower	ACE	3	Tier 1 VIP	Efficacy	pravastatin		0
rs11506105	lower	EGFR	3		Efficacy	peginterferon alfa-2a;peginterferon alfa-2b;ribavirin	Hepatitis C, Chronic	0
rs4148386	lower	ABCC2	3		Metabolism/PK	carbamazepine	Epilepsy	0
rs1799983	lower	NOS3	3		Toxicity	aspirin;Beta Blocking Agents;clopidogrel;hmg coa reductase inhibitors	Coronary Artery Disease	0
rs1799983	lower	NOS3	3		Efficacy	cyclophosphamide;doxorubicin;fluorouracil;methotrexate	Breast Neoplasms	0
rs1799983	lower	NOS3	3		Efficacy	anthracyclines and related substances;cyclophosphamide;doxorubicin;epirubicin;fluorouracil;methotrexate;oxaliplatin;Platinum compounds	Neoplasms;Ovarian Neoplasms;Stomach Neoplasms	0
rs1799983	lower	NOS3	3		Efficacy	salvianolic acid b	Coronary Disease	0
rs1799983	lower	NOS3	3		Efficacy	daunorubicin	Leukemia, Myeloid, Acute	0
rs1799983	lower	NOS3	3		Efficacy	Ace Inhibitors, Plain;Angiotensin II Antagonists;Beta Blocking Agents;digoxin;diuretics;spironolactone	Heart Failure	0
rs1799983	lower	NOS3	3		Efficacy	sorafenib	Carcinoma, Hepatocellular	0
rs932764	lower	PLCE1	3		Efficacy	hydrochlorothiazide	Hypertension	0
rs742105	lower	DTNBP1	3		Efficacy	clozapine	Schizophrenia	0
rs2760118	lower	ALDH5A1	3		Efficacy	methadone	Opioid-Related Disorders	0
rs9996584	lower	AREG	3		Efficacy	cetuximab;irinotecan;panitumumab	Colorectal Neoplasms	0
rs642990	lower		3		Toxicity	gemcitabine		0
rs1883112	lower	NCF4	3		Efficacy	idarubicin	Leukemia, Myeloid, Acute	0
rs1883112	lower	NCF4	3		Toxicity	doxorubicin;idarubicin	Neoplasms	0
rs2631367	lower	SLC22A5	3		Efficacy	imatinib	Gastrointestinal Stromal Tumors	0
rs1800896	lower	IL10	3		Toxicity	efavirenz	HIV Infections	0
rs1800896	lower	IL10	3		Dosage	tacrolimus	liver transplantation	0
rs1800896	lower	IL10	4		Metabolism/PK	tacrolimus	Transplantation	0
rs1800896	lower	IL10	3		Metabolism/PK	sirolimus	Kidney Transplantation	0
rs1800896	lower	IL10	3		Toxicity	Antiinflammatory agents, non-steroids		0
rs2274567	higher	CR1	3		Efficacy	eculizumab	paroxysmal nocturnal hemoglobinuria	0
rs3131003	higher	PSORS1C1	3		Toxicity	allopurinol	severe cutaneous adverse reactions	0
rs3815087	higher	PSORS1C1	4		Toxicity	allopurinol	Epidermal Necrolysis, Toxic;severe cutaneous adverse reactions;Stevens-Johnson Syndrome	0
rs2058878	higher	GRIN2B	3		Efficacy	acamprosate	Alcoholism	0
rs6539870	higher		3		Toxicity	etoposide		0
rs2742421	higher	SACM1L	3		Toxicity	bupropion	Depressive Disorder, Major	0
rs11229	higher	PRRC2A	3		Toxicity	carboplatin;gemcitabine	Carcinoma, Non-Small-Cell Lung;Thrombocytopenia	0
rs813676	higher	TJP1	3		Efficacy	risperidone	Schizophrenia	0
rs2233945	higher	PSORS1C1	3		Efficacy	etanercept	Arthritis, Rheumatoid	0
rs10885	higher	PRRC2A	3		Toxicity	carboplatin;gemcitabine	Carcinoma, Non-Small-Cell Lung;Thrombocytopenia	0
rs2523864	higher	HCG22	3		Toxicity	triamcinolone	Retinal Diseases	0
rs2189784	higher	CYP4F2	3	Tier 1 VIP	Dosage	warfarin		0
rs3873352	higher	HCG22	3		Toxicity	triamcinolone	Retinal Diseases	0
rs13207351	higher	VEGFA	3		Efficacy	docetaxel	Breast Neoplasms	0
rs9859552	higher	P2RY12	3		Efficacy	cangrelor		0
rs361525	higher	TNF	3		Efficacy	infliximab		0
rs1799964	higher	TNF	3		Efficacy	Tumor necrosis factor alpha (TNF-alpha) inhibitors	Spondylitis, Ankylosing	0
rs1799964	higher	TNF	3		Toxicity	stavudine	HIV Infections	0
rs130058	higher	HTR1B	3		Other	paroxetine	Depression	0
rs130058	higher	HTR1B	3		Toxicity	clomipramine;liothyronine;lithium;nefazodone;venlafaxine	Depression	0
rs3213094	higher	IL12B	3		Efficacy	ustekinumab	Psoriasis	0
rs2189814	higher	GRM3	3		Other	heroin	Heroin Dependence	0
rs2799018	higher	ARHGAP12	3		Efficacy	methylphenidate	Attention Deficit Disorder with Hyperactivity	1
rs396991	higher	FCGR3A	3		Efficacy	cetuximab	Neoplasms	0
rs396991	higher	FCGR3A	3		Efficacy	rituximab		0
rs396991	higher	FCGR3A	3		Efficacy	adalimumab;etanercept;infliximab	Psoriasis	0
rs396991	higher	FCGR3A	3		Efficacy	tocilizumab	Arthritis, Rheumatoid	0
rs396991	higher	FCGR3A	3		Efficacy	infliximab	Arthritis, Rheumatoid	0
rs396991	higher	FCGR3A	3		Efficacy	trastuzumab	Breast Neoplasms	0
rs396991	higher	FCGR3A	3		Other	antithymocyte globulin	Kidney Transplantation	0
rs7905446	higher	HTR7;RPP30	3		Efficacy	antidepressants	Depression	0
rs7905446	higher	HTR7;RPP30	3		Efficacy	paroxetine	Bipolar Disorder	0
rs7905446	higher	HTR7;RPP30	3		Efficacy	escitalopram	Depression	0
rs7905446	higher	HTR7	3		Efficacy	Selective serotonin reuptake inhibitors	Depression	0
rs3097671	higher	HLA-DPB1	3		Toxicity	aspirin	aspirin-induced asthma	1
rs2236855	higher	OPRD1	3		Toxicity	heroin	Heroin Dependence	0
rs6838116	higher	KCNIP4	3		Toxicity	Ace Inhibitors, Plain		0
rs2270777	higher	CDK4	3		Other	somatropin recombinant		1
rs696	higher	NFKBIA	3		Dosage	sufentanil	Pain, Postoperative	0
rs2960436	higher		3		Efficacy	fluorouracil	Stomach Neoplasms	0
rs785423	higher	TJP1	3		Efficacy	risperidone	Schizophrenia	0
rs2075572	higher	OPRM1	3		Toxicity	methadone	Opioid-Related Disorders	0
rs2075572	higher	OPRM1	3		Metabolism/PK	cotinine;nicotine		0
rs2075572	higher	OPRM1	3		Efficacy	ethanol		0
rs2075572	higher	OPRM1	3		Toxicity	heroin	Heroin Dependence	0
rs2075572	higher	OPRM1	3		Toxicity	methamphetamine	methamphetamine dependence	0
rs2844665	higher		3		Toxicity	allopurinol	Epidermal Necrolysis, Toxic;severe cutaneous adverse reactions;Stevens-Johnson Syndrome	0
rs705379	higher	PON1	3		Efficacy	atorvastatin;simvastatin	Hypercholesterolemia	0
rs705379	higher	PON1	3		Efficacy	atorvastatin	Hypercholesterolemia	0
rs3740066	higher	ABCC2	3		Toxicity	irinotecan	Carcinoma, Non-Small-Cell Lung	0
rs3740066	higher	ABCC2	3		Toxicity	cyclophosphamide;doxorubicin;fluorouracil	Breast Neoplasms	0
rs3740066	higher	ABCC2	3		Metabolism/PK	tacrolimus	Kidney Transplantation	0
rs3740066	higher	ABCC2	4		Efficacy	antiepileptics	Epilepsy	0
rs3740066	higher	ABCC2	3		Metabolism/PK	carbamazepine	Epilepsy	0
rs3740066	higher	ABCC2	3		Metabolism/PK	mycophenolic acid	Organ Transplantation	0
rs1800795	higher	IL6	3		Efficacy	fenofibrate	Cardiovascular Diseases	0
rs1800795	higher	IL6	3		Efficacy	Tumor necrosis factor alpha (TNF-alpha) inhibitors	Psoriasis	0
rs1800795	higher	IL6	3		Efficacy	adalimumab;etanercept;infliximab	Arthritis, Rheumatoid	0
rs1800795	higher	IL6	3		Toxicity	peginterferon alfa-2b;ribavirin	Hepatitis C, Chronic	0
rs2546890	higher	IL12B	3		Efficacy	Tumor necrosis factor alpha (TNF-alpha) inhibitors	Psoriasis	0
rs711355	higher	TJP1	3		Efficacy	risperidone	Schizophrenia	0
rs4253728	higher	PPARA	3		Efficacy	simvastatin		0
rs4253728	higher	PPARA	3		Toxicity	tacrolimus	Kidney Transplantation	1
rs4253728	higher	PPARA	3		Dosage	phenprocoumon		0
rs20417	higher	PTGS2	3		Efficacy	ibuprofen		0
rs20417	higher	PTGS2	3		Efficacy	rofecoxib		0
rs20417	higher	PTGS2	3		Efficacy	aspirin	Coronary Artery Disease	0
rs12762549	higher	ABCC2	3		Toxicity;Metabolism/PK	docetaxel		0
rs6688363	higher	ATP1A2	3		Efficacy	olanzapine	Schizophrenia	0
rs1969624	higher	SACM1L	3		Toxicity	bupropion	Depressive Disorder, Major	0
rs1113129	higher	CYP2C8	3	Tier 1 VIP	Toxicity	paclitaxel		0
rs1113129	higher	CYP2C8	3	Tier 1 VIP	Toxicity	paclitaxel	Breast Neoplasms	0
rs4823613	higher	PPARA	3		Efficacy	simvastatin		0
rs4823613	higher	PPARA	3		Other	tacrolimus	Organ Transplantation	0
rs2742423	higher	SACM1L	3		Toxicity	bupropion	Depressive Disorder, Major	0
rs2742435	higher	SACM1L	3		Toxicity	bupropion	Depressive Disorder, Major	0
rs12521868	higher	C5orf56	3		Efficacy	hydrochlorothiazide	Hypertension	0
rs10432303	higher	PIP5K1C	3		Toxicity	ethanol	Alcoholism	0
rs6728642	higher	FAM178B	3		Efficacy	lithium	Bipolar Disorder	0
rs2251954	higher	SACM1L	3		Toxicity	bupropion	Depressive Disorder, Major	0
rs2742390	higher	SACM1L	3		Toxicity	bupropion	Depressive Disorder, Major	0
rs2245705	higher	SACM1L	3		Toxicity	bupropion	Depressive Disorder, Major	0
rs11212617	higher	ATM;C11orf65	4		Efficacy	metformin	Diabetes Mellitus, Type 2	0
rs2074957	higher	PIP5K1C	3		Toxicity	ethanol	Alcoholism	0
rs7997012	higher	HTR2A	3		Efficacy	venlafaxine	Anxiety Disorders	0
rs7997012	higher	HTR2A	3		Toxicity	olanzapine		0
rs7997012	higher	HTR2A	3		Efficacy	citalopram	Depression;Depressive Disorder	0
rs7997012	higher	HTR2A	3		Efficacy	antidepressants	Bipolar Disorder;Depression;Depressive Disorder, Major	0
rs4506565	higher	TCF7L2	3		Toxicity	hydrochlorothiazide	Hypertension	0
rs7959663	higher	MYO1H	3		Efficacy	lithium	Bipolar Disorder	0
rs699947	higher	VEGFA	4		Efficacy	ranibizumab	Macular Degeneration	0
rs699947	higher	VEGFA	3		Efficacy	sildenafil	Erectile Dysfunction	0
rs699947	higher	VEGFA	3		Toxicity	sunitinib		0
rs699947	higher	VEGFA	4		Efficacy	docetaxel	Breast Neoplasms	0
rs699947	higher	VEGFA	3		Efficacy	bevacizumab;capecitabine;fluorouracil;irinotecan;leucovorin;oxaliplatin	Colorectal Neoplasms	0
rs699947	higher	VEGFA	3		Efficacy	enalapril	Hypertension	0
rs10931910	higher	AOX1	3		Metabolism/PK	XK469		0
rs1050152	higher	SLC22A4	3		Efficacy	imatinib	Gastrointestinal Stromal Tumors;Leukemia, Myelogenous, Chronic, BCR-ABL Positive	0
rs1801260	higher	CLOCK	4		Toxicity	lithium	Bipolar Disorder	0
rs3130931	higher	POU5F1	3		Toxicity	allopurinol	Epidermal Necrolysis, Toxic;severe cutaneous adverse reactions;Stevens-Johnson Syndrome	0
rs934635	higher		3		Toxicity	exemestane	Breast Neoplasms	0
rs1805034	higher	TNFRSF11A	3		Toxicity	acetaminophen;aspirin;diclofenac;propionic acid derivatives;Pyrazolones		0
rs2742417	higher	SACM1L	3		Toxicity	bupropion	Depressive Disorder, Major	0
rs717620	higher	ABCC2	3		Metabolism/PK	pitavastatin		0
rs717620	higher	ABCC2	3		Other	erythromycin		0
rs717620	higher	ABCC2	3		Toxicity	fluorouracil;leucovorin;oxaliplatin	Colonic Neoplasms	0
rs717620	higher	ABCC2	3		Toxicity	fluorouracil;leucovorin;oxaliplatin	Colorectal Neoplasms	0
rs717620	higher	ABCC2	4		Efficacy	antiepileptics	Epilepsy	0
rs717620	higher	ABCC2	3		Efficacy	atorvastatin	Hypercholesterolemia	0
rs717620	higher	ABCC2	3		Dosage	atorvastatin;simvastatin		0
rs717620	higher	ABCC2	4		Metabolism/PK	methotrexate	Leukemia, Lymphoid;Precursor Cell Lymphoblastic Leukemia-Lymphoma	1
rs717620	higher	ABCC2	3		Toxicity	methotrexate	Leukemia;Lymphoma;Osteosarcoma;Precursor Cell Lymphoblastic Leukemia-Lymphoma	1
rs717620	higher	ABCC2	3		Efficacy	cisplatin;doxorubicin;methotrexate	Osteosarcoma	1
rs717620	higher	ABCC2	3		Toxicity	deferasirox	beta-Thalassemia	1
rs717620	higher	ABCC2	3		Metabolism/PK	efavirenz	HIV Infections	0
rs717620	higher	ABCC2	3		Efficacy	tamoxifen	Breast Neoplasms	0
rs717620	higher	ABCC2	3		Toxicity	atazanavir;lopinavir;ritonavir;tenofovir		0
rs717620	higher	ABCC2	3		Toxicity	sorafenib	Exanthema	0
rs717620	higher	ABCC2	3		Metabolism/PK	cyclosporine;mycophenolic acid	Kidney Transplantation	0
rs717620	higher	ABCC2	3		Toxicity	tenofovir	HIV Infections	0
rs4606	higher	RGS2	3		Toxicity	antipsychotics	Schizophrenia	0
rs7178270	higher	CHRNB4	3		Toxicity	nicotine	Tobacco Use Disorder	0
rs10878232	higher	WIF1	3		Efficacy	Platinum compounds	Carcinoma, Non-Small-Cell Lung	0
rs17786412	higher	ANO2	3		Efficacy	duloxetine	Depressive Disorder, Major	0
rs2472677	higher	NR1I2	3		Other	rifampin		0
rs2472677	higher	NR1I2	3		Metabolism/PK	atazanavir	Acquired Immunodeficiency Syndrome;HIV Infections;nephrolithiasis	0
rs10771973	higher	FGD4	3		Toxicity	paclitaxel		0
rs187238	higher	IL18	3		Efficacy	interferons;ribavirin	Hepatitis C, Chronic	0
rs12210538	higher	SLC22A16	3		Toxicity	cyclophosphamide;doxorubicin	Breast Neoplasms	0
rs652888	higher	EHMT2	3		Toxicity	Antithyroid Preparations	Agranulocytosis	0
rs12255372	higher	TCF7L2	3		Efficacy	sulfonamides, urea derivatives	Diabetes Mellitus, Type 2	0
rs602950	higher	CDA	3		Toxicity	capecitabine	Neoplasms	0
rs602950	higher	CDA	3		Toxicity	cytarabine		0
rs2301159	higher	SLC10A2	3		Toxicity	docetaxel;thalidomide	Prostatic Neoplasms	0
rs915120	higher	GRK5	3		Efficacy	citalopram;escitalopram	Depressive Disorder	0
rs1517114	higher	C8orf34	3		Toxicity	irinotecan	Carcinoma, Non-Small-Cell Lung	0
rs886423	higher		3		Toxicity	carboplatin;gemcitabine	Carcinoma, Non-Small-Cell Lung;Thrombocytopenia	0
rs7699188	higher	ABCG2	3	Tier 1 VIP	Efficacy;Toxicity	fluorouracil;irinotecan;leucovorin	Colorectal Neoplasms	0
rs4731426	higher	LEP	3		Toxicity	olanzapine	Schizophrenia	0
rs2027701	higher		3		Toxicity	Platinum compounds;radiotherapy	Anemia;Dermatitis;Leukopenia;mucositis;Myelosuppression;Neutropenia;Thrombocytopenia	0
rs2229437	higher	PRCP	3		Efficacy	benazepril	Hypertension	0
rs4533622	higher	CTNNB1	3		Efficacy;Toxicity	lenalidomide;thalidomide	Multiple Myeloma	0
rs2236947	higher	RASSF1	3		Efficacy	cetuximab	Colorectal Neoplasms	0
rs6749447	higher	STK39	3		Efficacy	losartan		0
rs17655	higher	ERCC5	3		Efficacy	platinum	Ovarian Neoplasms	0
rs9285669	higher		3		Efficacy	hydrochlorothiazide	Essential hypertension	0
rs761142	higher	GCLC	3		Toxicity	sulfamethoxazole	HIV Infections	0
rs1544938	higher	ADCY2	3		Efficacy	antipsychotics	Schizophrenia	0
rs3130501	higher	POU5F1	3		Toxicity	allopurinol	Epidermal Necrolysis, Toxic;severe cutaneous adverse reactions;Stevens-Johnson Syndrome	0
rs72728438	higher	DPYD	3	Tier 1 VIP	Other	fluorouracil		0
rs11568820	higher	VDR	3		Metabolism/PK	midazolam		0
rs10800397	higher	NOS1AP	3		Toxicity	amiodarone	Long QT Syndrome	0
rs3766951	higher	OPRD1	3		Toxicity	heroin	Heroin Dependence	0
rs7903146	higher	TCF7L2	3		Efficacy	sulfonamides, urea derivatives		0
rs7903146	higher	TCF7L2	3		Toxicity	cyclosporine;sirolimus;tacrolimus	Kidney Transplantation;liver transplantation	0
rs10501087	higher	BDNF-AS	3		Efficacy	antipsychotics	Schizophrenia	0
rs301435	higher	SLC1A1	3		Efficacy	Selective serotonin reuptake inhibitors	Obsessive-Compulsive Disorder	0
rs1799722	higher	BDKRB2	3		Metabolism/PK	atorvastatin		0
rs1799722	higher	BDKRB2	3		Toxicity	Ace Inhibitors, Plain	Cough	0
rs1799722	higher	BDKRB2	3		Efficacy	enalapril		0
rs1799722	higher	BDKRB2	3		Toxicity	enalapril;imidapril;lisinopril	Cough;Essential hypertension	0
rs7917983	higher	TCF7L2	3		Toxicity	hydrochlorothiazide	Hypertension	0
rs308395	higher	FGF2	3		Efficacy	lenalidomide;thalidomide	Multiple Myeloma	0
rs4073	higher	CXCL8	3		Efficacy	bevacizumab	Macular Degeneration	0
rs12718541	higher	DDC	3		Toxicity	nicotine	Tobacco Use Disorder	0
rs2227956	higher	HSPA1L	3		Toxicity	carbamazepine	Epilepsy	0
rs4132670	higher	TCF7L2	3		Toxicity	hydrochlorothiazide	Hypertension	0
rs724226	higher	GRM3	3		Efficacy	risperidone	Schizophrenia	0
rs724226	higher	GRM3	3		Other	heroin	Heroin Dependence	0
rs7124442	higher	BDNF	3		Efficacy	citalopram	Depressive Disorder, Major	0
rs1829346	higher		3		Toxicity	Platinum compounds;radiotherapy	Nasopharyngeal Neoplasms	0
rs5993883	higher	COMT	3	Tier 1 VIP	Efficacy	quetiapine	Schizophrenia	0
rs2108622	higher	CYP4F2	3	Tier 1 VIP	Metabolism/PK	Vitamin K		0
rs2108622	higher	CYP4F2	3	Tier 1 VIP	Dosage	phenprocoumon		0
rs2108622	higher	CYP4F2	3	Tier 1 VIP	Metabolism/PK	vitamin e		1
rs2108622	higher	CYP4F2	3	Tier 1 VIP	Other	aspirin;clopidogrel	Acute coronary syndrome	0
rs2108622	higher	CYP4F2	3	Tier 1 VIP	Efficacy	warfarin		0
rs2108622	higher	CYP4F2	4	Tier 1 VIP	Other	warfarin	over-anticoagulation	0
rs3093105	higher	CYP4F2	3	Tier 1 VIP	Metabolism/PK	vitamin e		0
rs11568817	higher	HTR1B	3		Toxicity	escitalopram	Anxiety Disorders	0
rs7387065	higher	CSMD1	3		Efficacy	hydrochlorothiazide	Essential hypertension	0
rs2236857	higher	OPRD1	3		Toxicity	heroin	Heroin Dependence	0
rs10770141	higher	TH	3		Toxicity	opioids	Opioid-Related Disorders	0
rs4982133	higher		4		Efficacy	methotrexate	Arthritis, Rheumatoid	0
rs9361233	higher	HTR1B	3		Efficacy	fluoxetine	Depressive Disorder, Major	1
rs2299267	higher	PON2	3		Efficacy	antidepressants	Depressive Disorder, Major	0
rs9923231	higher	VKORC1	3	Tier 1 VIP	Toxicity	acenocoumarol	Hemorrhage	0
rs2241766	higher	ADIPOQ	3		Efficacy	pioglitazone	Diabetes Mellitus	0
rs2232228	higher	HAS3	3		Toxicity	anthracyclines and related substances	Cardiomyopathies	1
rs4877847	higher	SLC28A3	4		Toxicity	anthracyclines and related substances	Neoplasms	1
rs4604006	higher		3		Efficacy	sorafenib	Carcinoma, Hepatocellular	0
rs12946454	higher	PLCD3	3		Efficacy	diltiazem	Hypertension	0
rs9934438	higher	VKORC1	3	Tier 1 VIP	Efficacy	fluindione	Thromboembolism	0
rs9934438	higher	VKORC1	3	Tier 1 VIP	Efficacy	warfarin		0
rs9934438	higher	VKORC1	3	Tier 1 VIP	Efficacy	warfarin		0
rs11030104	higher	BDNF	3		Efficacy	antipsychotics	Schizophrenia	0
rs10879346	higher	TPH2	3		Efficacy	antidepressants;mirtazapine;venlafaxine	Depressive Disorder, Major	0
rs2734841	higher	DRD2	3	Tier 1 VIP	Toxicity	olanzapine		0
rs4553808	higher	CTLA4	3		Toxicity	bortezomib;dexamethasone;melphalan;prednisone		0
rs4553808	higher	CTLA4	3		Metabolism/PK	tacrolimus	Kidney Transplantation	0
rs11052877	higher	CD69	3		Efficacy	tocilizumab	Arthritis, Rheumatoid	0
rs3087879	higher	SLC1A1	3		Efficacy	Selective serotonin reuptake inhibitors	Obsessive-Compulsive Disorder	0
rs17179108	higher	HLA-G	3		Efficacy	capecitabine;fluorouracil	Colorectal Neoplasms	0
rs6545803	higher		3		Toxicity	nevirapine	HIV Infections	0
rs17786400	higher	ANO2	3		Efficacy	duloxetine	Depressive Disorder, Major	0
rs1876828	higher	CRHR1	3		Efficacy	corticosteroids	Asthma	1
rs11124945	higher	PLEKHH2	3		Toxicity	atenolol;verapamil	Diabetes Mellitus;Hypertension	0
rs7588746	higher		3		Efficacy	lithium	Bipolar Disorder	0
rs532545	higher	CDA	3		Efficacy	cytarabine	Leukemia, Myeloid, Acute;Neoplasms	0
rs532545	higher	CDA	3		Toxicity	cytarabine	Leukemia, Myeloid	0
rs11503014	higher	GABRA2	3		Toxicity	cocaine	Cocaine-Related Disorders	0
rs2298897	higher	OPRD1	3		Toxicity	heroin	Heroin Dependence	0
rs3094188	higher	PSORS1C3	3		Toxicity	allopurinol	Epidermal Necrolysis, Toxic;severe cutaneous adverse reactions;Stevens-Johnson Syndrome	0
rs2241843	higher	BCL2L11	3		Toxicity	corticosteroids	Precursor Cell Lymphoblastic Leukemia-Lymphoma	1
rs716274	higher	DYNC2H1	3		Efficacy	etoposide;Platinum compounds		0
rs6265	higher	BDNF	3		Efficacy	paroxetine	Depressive Disorder, Major	0
rs6265	higher	BDNF	4		Other	heroin;methamphetamine	Substance-Related Disorders	0
rs6265	higher	BDNF	4		Toxicity	fluoxetine	Depressive Disorder, Major	0
rs6265	higher	BDNF	3		Efficacy	antidepressants;citalopram;paroxetine	Depressive Disorder	0
rs6265	higher	BDNF	3		Toxicity	methamphetamine	methamphetamine dependence	0
rs6265	higher	BDNF	3		Efficacy	antipsychotics	Schizophrenia	0
rs6265	higher	BDNF	3		Efficacy	olanzapine	Schizophrenia	0
rs6265	higher	BDNF	3		Toxicity	antipsychotics	Schizophrenia	0
rs6265	higher	BDNF	3		Other	Analgesics;Antiinflammatory agents, non-steroids;Ergot alkaloids;opioids;sumatriptan		0
rs4889606	higher	STX1B	3		Efficacy	warfarin		0
rs909706	higher	DTNBP1	3		Efficacy	haloperidol	Schizophrenia	0
rs2289669	higher	SLC47A1	3		Efficacy	metformin	Diabetes Mellitus, Type 2;Polycystic Ovary Syndrome	0
rs10871454	higher	STX4	3		Dosage	warfarin		0
rs10871454	higher	STX4	3		Dosage	phenprocoumon		0
rs12800734	higher	GRIK4	3		Efficacy	antidepressants	Depressive Disorder	0
rs451774	higher	GPX5	3		Efficacy	carboplatin;cisplatin;gemcitabine	Carcinoma, Non-Small-Cell Lung	0
rs2619538	higher	DTNBP1	3		Toxicity	methamphetamine	Psychotic Disorders	0
rs1799971	higher	OPRM1	4		Efficacy	Drugs used in nicotine dependence;nicotine	Tobacco Use Disorder	0
rs1799971	higher	OPRM1	3		Toxicity	opioids	Sleep Disorders	0
rs1799971	higher	OPRM1	3		Toxicity	morphine	Sleep Apnea Syndromes	0
rs1799971	higher	OPRM1	4		Toxicity	sufentanil	adverse events;Pain, Postoperative	0
rs1799971	higher	OPRM1	3		Toxicity	ethanol		0
rs1799971	higher	OPRM1	3		Toxicity	heroin	Heroin Dependence	0
rs1799971	higher	OPRM1	3		Dosage	morphine	Pain;Pain, Postoperative	1
rs1799971	higher	OPRM1	3		Efficacy	tramadol	Pain, Postoperative	0
rs1799971	higher	OPRM1	3		Toxicity	buprenorphine;fentanyl;tramadol	adverse events;Opioid-Related Disorders	0
rs1799971	higher	OPRM1	3		Toxicity	alfentanil		0
rs1799971	higher	OPRM1	3		Toxicity	fentanyl	somnolence	0
rs1799971	higher	OPRM1	3		Efficacy	Opioid anesthetics;Other general anesthetics;volatile anesthetics		0
rs1799971	higher	OPRM1	3		Efficacy	naloxone		0
rs1799971	higher	OPRM1	4		Efficacy	naltrexone	Alcoholism;hypersexuality state;Tobacco Use Disorder	0
rs1799971	higher	OPRM1	3		Toxicity	antidepressants;antipsychotics;benzodiazepine derivatives;opioids;Sympathomimetics	Heart Arrest;Overdose;Respiratory Insufficiency	0
rs1799971	higher	OPRM1	3		Toxicity	nicotine	Tobacco Use Disorder	1
rs1799971	higher	OPRM1	4		Toxicity	nicotine	Tobacco Use Disorder	0
rs1799971	higher	OPRM1	4		Toxicity	cocaine	Cocaine-Related Disorders	1
rs1799971	higher	OPRM1	3		Efficacy	alfentanil	Pain	0
rs1799971	higher	OPRM1	3		Metabolism/PK	alfentanil	Pain	0
rs1799971	higher	OPRM1	3		Efficacy	opioids	Pain, Postoperative	0
rs1799971	higher	OPRM1	3		Toxicity	cannabinoids	Marijuana Abuse	0
rs1799971	higher	OPRM1	3		Dosage	ethanol		1
rs1799971	higher	OPRM1	4		Dosage	nicotine		0
rs1799971	higher	OPRM1	3		Toxicity	morphine	Pain, Postoperative;Pruritus	0
rs1799971	higher	OPRM1	3		Other	nicotine		1
rs1799971	higher	OPRM1	3		Other	Analgesics;Antiinflammatory agents, non-steroids;Ergot alkaloids;opioids;sumatriptan	Substance Withdrawal Syndrome	0
rs1799971	higher	OPRM1	4		Toxicity	oxycodone	adverse events;Constipation;Delirium;Nausea;Pruritus;somnolence;Urinary Retention	0
rs1799971	higher	OPRM1	3		Toxicity	hydrocodone	Constipation;dry mouth;Respiratory Insufficiency	0
rs1799971	higher	OPRM1	3		Toxicity	methadone	Opioid-Related Disorders;Sleep Disorders	0
rs1799971	higher	OPRM1	4		Toxicity	ethanol	Alcoholism	1
rs1799971	higher	OPRM1	3		Toxicity	opioids	adverse events;Nausea;Vomiting	0
rs1799971	higher	OPRM1	4		Toxicity	opioids	Opioid-Related Disorders	1
rs1799971	higher	OPRM1	3		Metabolism/PK	cotinine;nicotine		0
rs1799971	higher	OPRM1	4		Toxicity	heroin	Heroin Dependence	0
rs1799971	higher	OPRM1	3		Dosage	alfentanil	Pain	0
rs1799971	higher	OPRM1	3		Dosage	codeine		0
rs1799971	higher	OPRM1	3		Efficacy	fentanyl	Pain	0
rs1799971	higher	OPRM1	3		Efficacy	morphine	Pain;Pain, Postoperative	1
rs1799971	higher	OPRM1	3		Dosage	oxycodone	Pain;Pain, Postoperative	0
rs1799971	higher	OPRM1	3		Efficacy	nicotine	Tobacco Use Disorder	0
rs1799971	higher	OPRM1	3		Dosage	fentanyl	Pain;Pain, Postoperative	0
rs1799971	higher	OPRM1	3		Dosage	sufentanil	Pain;Pain, Postoperative	0
rs1799971	higher	OPRM1	3		Efficacy	acetaminophen;tramadol	neuropathic pain	0
rs1799971	higher	OPRM1	4		Metabolism/PK	morphine		0
rs1799971	higher	OPRM1	3		Toxicity	ethanol	Alcoholism	0
rs1799971	higher	OPRM1	3		Toxicity	tianeptine	Depressive Disorder, Major;suicidal ideation	0
rs1799971	higher	OPRM1	3		Dosage	opioids	Pain;Pain, Postoperative	0
rs1799971	higher	OPRM1	4		Toxicity	cannabinoids;cocaine;ethanol;nicotine;opioids	Substance-Related Disorders	0
rs1799971	higher	OPRM1	3		Toxicity	methadone	Neonatal Abstinence Syndrome	1
rs1799971	higher	OPRM1	3		Toxicity	morphine	Neonatal Abstinence Syndrome	1
rs1799971	higher	OPRM1	3		Efficacy	oxycodone		0
rs870995	higher	PIK3CA	3		Dosage	docetaxel	Carcinoma, Non-Small-Cell Lung	0
rs833061	higher	VEGFA	3		Toxicity	sunitinib		0
rs1643650	higher	DHFR	3		Efficacy	methotrexate	Arthritis, Rheumatoid	0
rs2337980	higher	CHRNA7	3		Efficacy	nicotine		0
rs17724452	higher	ANO2	3		Efficacy	duloxetine	Depressive Disorder, Major	0
rs740603	higher	COMT	3	Tier 1 VIP	Toxicity	buprenorphine	Neonatal Abstinence Syndrome	0
rs740603	higher	COMT	3	Tier 1 VIP	Toxicity	methadone	Neonatal Abstinence Syndrome	0
rs73208473	higher	SORCS2	3		Metabolism/PK	atazanavir	HIV Infections	0
rs2869950	higher	CHRNB4	3		Toxicity	nicotine	Tobacco Use Disorder	0
rs1448673	higher		3		Efficacy	interferon beta-1a;interferon beta-1b	Multiple Sclerosis	0
rs10846744	higher	SCARB1	3		Efficacy	peginterferon alfa-2a;ribavirin	Hepatitis C, Chronic	0
rs4984241	higher	CA12	3		Other	topiramate;zonisamide		0
rs471760	higher	CDA	3		Toxicity	gemcitabine	Neutropenia;Pancreatic Neoplasms	0
rs2396185	higher	INSR	3		Efficacy	topiramate		0
rs10161126	higher	MVK	3		Efficacy	alendronate	Bone Diseases	0
rs1045642	higher	ABCB1	3	Tier 1 VIP	Toxicity	opioids	Low Back Pain	0
rs1045642	higher	ABCB1	4	Tier 1 VIP	Dosage	warfarin		0
rs1045642	higher	ABCB1	3	Tier 1 VIP	Other	talinolol		0
rs1045642	higher	ABCB1	3	Tier 1 VIP	Toxicity	atorvastatin	Coronary Artery Disease;Myalgia unspecified	0
rs1045642	higher	ABCB1	3	Tier 1 VIP	Toxicity	simvastatin	Hypercholesterolemia;Myalgia unspecified	0
rs1045642	higher	ABCB1	3	Tier 1 VIP	Efficacy	lamivudine;lopinavir;ritonavir;zidovudine	HIV Infections	0
rs1045642	higher	ABCB1	3	Tier 1 VIP	Efficacy	tamoxifen	Breast Neoplasms	0
rs1045642	higher	ABCB1	3	Tier 1 VIP	Efficacy	oxaliplatin	Colorectal Neoplasms	0
rs1045642	higher	ABCB1	4	Tier 1 VIP	Efficacy	simvastatin		0
rs1045642	higher	ABCB1	3	Tier 1 VIP	Efficacy	anthracyclines and related substances;taxanes	Breast Neoplasms	0
rs1045642	higher	ABCB1	3	Tier 1 VIP	Efficacy	atorvastatin	Coronary Artery Disease	0
rs1045642	higher	ABCB1	3	Tier 1 VIP	Efficacy	ondansetron	Postoperative Nausea and Vomiting;Vomiting	0
rs1045642	higher	ABCB1	3	Tier 1 VIP	Other	verapamil		0
rs1045642	higher	ABCB1	3	Tier 1 VIP	Toxicity	sirolimus	Kidney Transplantation	0
rs1045642	higher	ABCB1	3	Tier 1 VIP	Efficacy	tramadol	Fractures, Bone;Pain;Pain, Postoperative	0
rs1045642	higher	ABCB1	4	Tier 1 VIP	Metabolism/PK	risperidone	Bipolar Disorder;Depression;Psychotic Disorders;Schizophrenia;Substance-Related Disorders	0
rs1045642	higher	ABCB1	3	Tier 1 VIP	Toxicity	cyclophosphamide;doxorubicin;fluorouracil	Breast Neoplasms	0
rs1045642	higher	ABCB1	3	Tier 1 VIP	Efficacy;Toxicity	methotrexate	Arthritis, Rheumatoid	1
rs1045642	higher	ABCB1	3	Tier 1 VIP	Efficacy;Toxicity	efavirenz;nelfinavir	HIV Infections	0
rs1045642	higher	ABCB1	3	Tier 1 VIP	Dosage	fexofenadine		0
rs1045642	higher	ABCB1	3	Tier 1 VIP	Toxicity	nevirapine	HIV Infections;Toxic liver disease	0
rs1045642	higher	ABCB1	3	Tier 1 VIP	Other	prednisone;tacrolimus	Organ Transplantation;Transplantation	0
rs1045642	higher	ABCB1	3	Tier 1 VIP	Toxicity	nortriptyline	Depression;Depressive Disorder;Depressive Disorder, Major;Hypotension	0
rs1045642	higher	ABCB1	3	Tier 1 VIP	Metabolism/PK	lansoprazole;tacrolimus	Gastroesophageal Reflux;Transplantation	0
rs1045642	higher	ABCB1	3	Tier 1 VIP	Toxicity	oseltamivir		1
rs1045642	higher	ABCB1	4	Tier 1 VIP	Efficacy	antiepileptics	Epilepsies, Partial;Epilepsy;Epilepsy, Generalized	1
rs1045642	higher	ABCB1	3	Tier 1 VIP	Efficacy	dexamethasone;doxorubicin;vincristine	Multiple Myeloma	0
rs1045642	higher	ABCB1	3	Tier 1 VIP	Other	rhodamine 123		0
rs1045642	higher	ABCB1	3	Tier 1 VIP	Toxicity	capecitabine	Neoplasms	0
rs1045642	higher	ABCB1	4	Tier 1 VIP	Efficacy	carbamazepine	Epilepsy	0
rs1045642	higher	ABCB1	3	Tier 1 VIP	Toxicity	paclitaxel	Neoplasms;Neurotoxicity Syndromes	0
rs1045642	higher	ABCB1	3	Tier 1 VIP	Efficacy	paclitaxel	Breast Neoplasms	0
rs1045642	higher	ABCB1	3	Tier 1 VIP	Metabolism/PK	cyclosporine	Transplantation	0
rs1045642	higher	ABCB1	3	Tier 1 VIP	Efficacy	phenytoin	Epilepsy	0
rs1045642	higher	ABCB1	3	Tier 1 VIP	Dosage	phenytoin		0
rs1045642	higher	ABCB1	3	Tier 1 VIP	Efficacy;Toxicity;Metabolism/PK	clopidogrel	Acute coronary syndrome;Myocardial Infarction	0
rs1045642	higher	ABCB1	3	Tier 1 VIP	Other	dicloxacillin		0
rs1045642	higher	ABCB1	4	Tier 1 VIP	Efficacy	cisplatin;fluorouracil	Esophageal Neoplasms	0
rs1045642	higher	ABCB1	4	Tier 1 VIP	Toxicity	fluorouracil	Colorectal Neoplasms	0
rs1045642	higher	ABCB1	3	Tier 1 VIP	Metabolism/PK	digoxin		0
rs1045642	higher	ABCB1	3	Tier 1 VIP	Efficacy;Metabolism/PK	oxcarbazepine	Epilepsy	0
rs1045642	higher	ABCB1	3	Tier 1 VIP	Metabolism/PK	tramadol		0
rs1045642	higher	ABCB1	3	Tier 1 VIP	Toxicity	everolimus	Breast Neoplasms;mucositis	0
rs1045642	higher	ABCB1	3	Tier 1 VIP	Toxicity	bleomycin;cisplatin;etoposide	Testicular Neoplasms;Vomiting	0
rs1045642	higher	ABCB1	4	Tier 1 VIP	Efficacy	methotrexate	Arthritis, Juvenile Rheumatoid;Arthritis, Rheumatoid	1
rs1045642	higher	ABCB1	4	Tier 1 VIP	Efficacy	fentanyl	Pain	1
rs1045642	higher	ABCB1	3	Tier 1 VIP	Other	hmg coa reductase inhibitors		0
rs1045642	higher	ABCB1	3	Tier 1 VIP	Other	efavirenz	HIV Infections	1
rs1045642	higher	ABCB1	3	Tier 1 VIP	Efficacy	morphine	Pain	0
rs1045642	higher	ABCB1	4	Tier 1 VIP	Dosage	morphine	Pain;Pain, Postoperative	0
rs1045642	higher	ABCB1	3	Tier 1 VIP	Efficacy	imatinib	Leukemia, Myelogenous, Chronic, BCR-ABL Positive	0
rs1045642	higher	ABCB1	3	Tier 1 VIP	Toxicity	sorafenib	Carcinoma, Renal Cell;Hypertension	0
rs1045642	higher	ABCB1	3	Tier 1 VIP	Efficacy	venlafaxine	Depressive Disorder;Narcolepsy	0
rs1045642	higher	ABCB1	3	Tier 1 VIP	Efficacy	Selective serotonin reuptake inhibitors	Depressive Disorder	0
rs1045642	higher	ABCB1	3	Tier 1 VIP	Efficacy	modafinil	Narcolepsy	0
rs1045642	higher	ABCB1	3	Tier 1 VIP	Metabolism/PK	silibinin		0
rs1045642	higher	ABCB1	3	Tier 1 VIP	Metabolism/PK	daptomycin		0
rs1045642	higher	ABCB1	3	Tier 1 VIP	Other	morphine	Pain	1
rs1045642	higher	ABCB1	3	Tier 1 VIP	Toxicity	methotrexate	Burkitt Lymphoma;Drug Toxicity;Lymphoma, T-Cell;Precursor Cell Lymphoblastic Leukemia-Lymphoma	1
rs1045642	higher	ABCB1	3	Tier 1 VIP	Other	opioids	Opioid-Related Disorders	0
rs1045642	higher	ABCB1	3	Tier 1 VIP	Toxicity	codeine		0
rs1045642	higher	ABCB1	4	Tier 1 VIP	Efficacy	pantoprazole	Helicobacter Infections	0
rs1045642	higher	ABCB1	3	Tier 1 VIP	Dosage	opioids	Pain;Pain, Postoperative	0
rs1045642	higher	ABCB1	3	Tier 1 VIP	Metabolism/PK	etoposide	Precursor Cell Lymphoblastic Leukemia-Lymphoma	0
rs1045642	higher	ABCB1	3	Tier 1 VIP	Efficacy	phenobarbital	Epilepsy	0
rs1045642	higher	ABCB1	3	Tier 1 VIP	Toxicity	methylprednisolone;prednisolone	Kidney Transplantation	0
rs1045642	higher	ABCB1	3	Tier 1 VIP	Other	olanzapine	Psychotic Disorders	0
rs1045642	higher	ABCB1	4	Tier 1 VIP	Other	atazanavir;ritonavir	HIV Infections	1
rs1045642	higher	ABCB1	3	Tier 1 VIP	Efficacy	tacrolimus	Colitis, Ulcerative	0
rs1045642	higher	ABCB1	3	Tier 1 VIP	Toxicity	tacrolimus	Kidney Transplantation	1
rs1045642	higher	ABCB1	4	Tier 1 VIP	Toxicity	tacrolimus	Kidney Transplantation	1
rs1045642	higher	ABCB1	3	Tier 1 VIP	Toxicity	risperidone	Schizophrenia	0
rs1045642	higher	ABCB1	3	Tier 1 VIP	Toxicity	sunitinib	Carcinoma, Renal Cell	0
rs1045642	higher	ABCB1	4	Tier 1 VIP	Dosage;Metabolism/PK	carbamazepine	Epilepsy	0
rs1045642	higher	ABCB1	3	Tier 1 VIP	Efficacy	vincristine	Precursor Cell Lymphoblastic Leukemia-Lymphoma	1
rs1045642	higher	ABCB1	3	Tier 1 VIP	Efficacy	granisetron	Neoplasms	0
rs1045642	higher	ABCB1	3	Tier 1 VIP	Metabolism/PK	rivaroxaban		0
rs1045642	higher	ABCB1	4	Tier 1 VIP	Efficacy	clopidogrel	platelet reactivity	0
rs1045642	higher	ABCB1	3	Tier 1 VIP	Toxicity	rivaroxaban		0
rs1045642	higher	ABCB1	3	Tier 1 VIP	Efficacy;Metabolism/PK	omeprazole	Gastroesophageal Reflux	1
rs1045642	higher	ABCB1	3	Tier 1 VIP	Toxicity	fentanyl	Pain, Postoperative;Respiratory Insufficiency	0
rs1045642	higher	ABCB1	3	Tier 1 VIP	Toxicity	Antivirals for treatment of HIV infections, combinations;Drugs For Treatment Of Tuberculosis	HIV Infections;Tuberculosis	0
rs1045642	higher	ABCB1	3	Tier 1 VIP	Efficacy	Platinum compounds	Carcinoma, Non-Small-Cell Lung	0
rs1045642	higher	ABCB1	3	Tier 1 VIP	Efficacy	losartan	Hypertension	0
rs1045642	higher	ABCB1	3	Tier 1 VIP	Dosage	antipsychotics	Schizophrenia	0
rs1045642	higher	ABCB1	3	Tier 1 VIP	Metabolism/PK	voriconazole		0
rs1045642	higher	ABCB1	3	Tier 1 VIP	Toxicity	Drugs For Treatment Of Tuberculosis;isoniazid	Tuberculosis	0
rs1045642	higher	ABCB1	3	Tier 1 VIP	Toxicity	clozapine		0
rs1045642	higher	ABCB1	3	Tier 1 VIP	Metabolism/PK	Dabigatran		0
rs1045642	higher	ABCB1	3	Tier 1 VIP	Toxicity	anastrozole	Arthralgia;Breast Neoplasms	0
rs1045642	higher	ABCB1	3	Tier 1 VIP	Efficacy	agomelatine	Depressive Disorder	0
rs1045642	higher	ABCB1	3	Tier 1 VIP	Toxicity	tacrolimus	Kidney Transplantation	0
rs1045642	higher	ABCB1	3	Tier 1 VIP	Toxicity	clopidogrel	Coronary Disease;Hemorrhage	0
rs1045642	higher	ABCB1	4	Tier 1 VIP	Dosage;Metabolism/PK	tacrolimus	Organ Transplantation	1
rs1045642	higher	ABCB1	3	Tier 1 VIP	Efficacy	cytarabine	Leukemia, Myeloid, Acute	0
rs1045642	higher	ABCB1	3	Tier 1 VIP	Dosage	fentanyl	Pain;Pain, Postoperative	1
rs1045642	higher	ABCB1	3	Tier 1 VIP	Dosage	oxycodone	Pain	0
rs1045642	higher	ABCB1	3	Tier 1 VIP	Toxicity	antineoplastic agents	Neoplasms	0
rs1045642	higher	ABCB1	4	Tier 1 VIP	Dosage	methadone	Heroin Dependence;Opioid-Related Disorders	0
rs1045642	higher	ABCB1	3	Tier 1 VIP	Dosage	methadone	Pain	0
rs1045642	higher	ABCB1	3	Tier 1 VIP	Metabolism/PK	methadone	Opioid-Related Disorders	0
rs1045642	higher	ABCB1	3	Tier 1 VIP	Dosage	remifentanil		0
rs1045642	higher	ABCB1	3	Tier 1 VIP	Efficacy	remifentanil		0
rs1045642	higher	ABCB1	3	Tier 1 VIP	Efficacy	morphine;nortriptyline	Pain	0
rs1045642	higher	ABCB1	4	Tier 1 VIP	Efficacy	methotrexate	Precursor Cell Lymphoblastic Leukemia-Lymphoma	1
rs1045642	higher	ABCB1	3	Tier 1 VIP	Metabolism/PK	methotrexate	Burkitt Lymphoma;Lymphoma, T-Cell;Precursor Cell Lymphoblastic Leukemia-Lymphoma	1
